## **Loss of cytoplasmic incompatibility and minimal fecundity effects explain relatively low *Wolbachia* frequencies in *Drosophila mauritiana***

Megan K. Meany<sup>1</sup>, William R. Conner<sup>1</sup>, Sophia V. Richter<sup>1</sup>, Jessica A. Bailey<sup>1</sup>, Michael Turelli<sup>2</sup> and Brandon S. Cooper<sup>1¶</sup>

<sup>1</sup>Division of Biological Sciences, University of Montana, Missoula, MT USA

<sup>2</sup>Department of Evolution and Ecology, University of California, Davis, CA USA

Correspondence:

¶Division of Biological Sciences

University of Montana

32 Campus Drive, ISB

Missoula, MT 59812, USA

Email: [brandon.cooper@umontana.edu](mailto:brandon.cooper@umontana.edu)

**RUNNING TITLE:** *wMau Wolbachia* in *Drosophila mauritiana*

### **KEYWORDS**

host-microbe interactions, introgression, spatial spread, *wMau Wolbachia*, WO phage

## ABSTRACT

1 Maternally transmitted *Wolbachia* bacteria infect about half of all insect species. Many  
2 *Wolbachia* cause cytoplasmic incompatibility (CI), reduced egg hatch when uninfected females  
3 mate with infected males. CI produces a frequency-dependent fitness advantage that leads to  
4 high equilibrium *Wolbachia* frequencies but does not aid *Wolbachia* spread from low  
5 frequencies. The fitness advantages that produce initial *Wolbachia* spread and maintain non-CI  
6 *Wolbachia* remain elusive. *Wolbachia* variant *w*Mau that infects *Drosophila mauritiana* does not  
7 cause CI, despite being very closely related to the CI-causing *Wolbachia w*No in *D. simulans*  
8 (0.068% sequence divergence over 682,494 bp), suggesting that CI was recently lost. Using draft  
9 *Wolbachia* genomes, we identify a deletion in a WO phage gene that may disrupt CI. We find no  
10 evidence that *w*Mau increases host fecundity. We report intermediate and apparently stable  
11 *w*Mau infection frequencies on the Indian Ocean island of Mauritius, consistent with no CI and  
12 no appreciable positive effect on fecundity. Our data indicate that *w*Mau frequencies reflect a  
13 balance between unknown, weak positive effects on fitness and imperfect maternal transmission.  
14 Phylogenomic analyses suggest that Supergroup B *Wolbachia*, including *w*Mau, diverged from  
15 Supergroup A *Wolbachia*, including *w*Mel from *D. melanogaster*, 6–46 million years ago, later  
16 than previously estimated.

## INTRODUCTION

17 Maternally transmitted *Wolbachia* infect about half of all insect species (Werren and Windsor  
18 2000; Zug and Hammerstein 2012; Weinert et al. 2015), as well as other arthropods (Jeyaprakash  
19 and Hoy 2000; Hilgenboecker et al. 2008) and nematodes (Taylor et al. 2013). Host species may  
20 acquire *Wolbachia* from common ancestors, from sister species via hybridization and  
21 introgression, or horizontally (O'Neill et al. 1992; Rousset and Solignac 1995; Huigens et al.  
22 2004; Baldo et al. 2008; Raychoudhury et al. 2009; Gerth and Bleidorn 2016; Schuler et al.  
23 2016; Turelli et al. 2018). Many *Wolbachia* cause cytoplasmic incompatibility (CI), reduced egg  
24 hatch when uninfected females mate with *Wolbachia*-infected males. Three parameters usefully  
25 approximate the frequency dynamics and equilibria of CI-causing *Wolbachia*: the relative hatch  
26 rate of uninfected eggs fertilized by infected males ( $H$ ), the fitness of infected females relative to  
27 uninfected females ( $F$ ), and the proportion of uninfected ova produced by infected females ( $\mu$ )  
28 (Caspari and Watson 1959; Hoffmann et al. 1990). To spread deterministically from low  
29 frequencies, *Wolbachia* must produce  $F(1 - \mu) > 1$ , irrespective of CI. Once they become  
30 sufficiently common, CI-causing infections, such as *w*Ri-like *Wolbachia* in *Drosophila simulans*  
31 and several other *Drosophila* (Turelli et al. 2018), spread to high equilibrium frequencies,  
32 dominated by a balance between CI and imperfect maternal transmission (Turelli and Hoffmann  
33 1995; Kreisner et al. 2016). In contrast, non-CI-causing *Wolbachia*, such as *w*Au in *D. simulans*,  
34 typically persist at lower equilibrium frequencies, maintained by a balance between positive  
35 *Wolbachia* effects on host fitness and imperfect maternal transmission (Hoffmann and Turelli  
36 1997; Kreisner et al. 2013). When  $H < F(1 - \mu) < 1$ , “bistable” dynamics result, producing  
37 stable equilibria at 0 and at a higher frequency denoted  $p_s$ , where  $0.50 < p_s \leq 1$  (Turelli and  
38 Hoffmann 1995). Bistability explains the pattern and rate of spread of *w*Mel transinfected into  
39 *Aedes aegypti* to suppress the spread of dengue, Zika and other human diseases (Hoffmann et al.  
40 2011; Barton and Turelli 2011; Turelli and Barton 2017; Schmidt et al. 2017).

41 In contrast to the bistability observed with *w*Mel transinfections, natural *Wolbachia*  
42 infections seem to spread via “Fisherian” dynamics with  $F(1 - \mu) > 1$  (Fisher 1937; Kreisner et  
43 al. 2013; Hamm et al. 2014). Several *Wolbachia* effects could generate  $F(1 - \mu) > 1$ , but we do  
44 not yet know which ones actually do. For example, *w*Ri has evolved to increase *D. simulans*  
45 fecundity in only a few decades (Weeks et al. 2007), *w*Mel seems to enhance *D. melanogaster*  
46 fitness in high and low iron environments (Brownlie et al. 2009), and several *Wolbachia*

47 including *wMel* protect their *Drosophila* hosts from RNA viruses (Hedges et al. 2008; Teixeira  
48 et al. 2008; Martinez et al. 2014). However, it remains unknown which if any these potential  
49 fitness benefits underlie *Wolbachia* spread in nature. For instance, *wMel* seems to have little  
50 effect on viral abundance in wild-caught *D. melanogaster* (Shi et al. 2018).

51 *D. mauritiana*, *D. simulans* and *D. sechellia* comprise the *D. simulans* clade within the nine-  
52 species *D. melanogaster* subgroup of *Drosophila*. The *D. simulans* clade diverged from *D.*  
53 *melanogaster* approximately three million years ago (mya), with the island endemics *D. sechellia*  
54 (Seychelles archipelago) and *D. mauritiana* (Mauritius) thought to originate in only the last few  
55 hundred thousand years (Lachaise et al. 1986; Ballard 2000a; Dean and Ballard 2004;  
56 McDermott and Kliman 2008; Garrigan et al. 2012; Brand et al. 2013; Garrigan et al. 2014). *D.*  
57 *simulans* is widely distributed around the globe, but has never been collected on Mauritius  
58 (David et al. 1989; Legrand et al. 2011). However, evidence of mitochondrial and nuclear  
59 introgression supports interisland migration and hybridization between these species (Ballard  
60 2000a; Nunes et al. 2010; Garrigan et al. 2012), which could allow introgressive *Wolbachia*  
61 transfer (Rousset and Solignac 1995).

62 *D. mauritiana* is infected with *Wolbachia* denoted *wMau*, likely acquired via introgression  
63 from other *D. simulans*-clade hosts (Rousset and Solignac 1995). *Wolbachia* variant *wMau* may  
64 also infect *D. simulans* in Madagascar and elsewhere in Africa and the South Pacific (denoted  
65 *wMa* in *D. simulans*) (Ballard 2000a; Ballard 2004). *wMau* does not cause CI in *D. mauritiana*  
66 or when transinfected into *D. simulans* (Giordano et al. 1995), despite being very closely related  
67 to *wNo* strains that do cause CI in *D. simulans* (Merçot et al. 1995; Rousset and Solignac 1995;  
68 James and Ballard 2000). (Also, *D. simulans* seems to be a “permissive” host for CI, as  
69 evidenced by the fact that *wMel*, which causes little CI in its native host, *D. melanogaster*,  
70 causes intense CI in *D. simulans* [Poinsot et al. 1998].) In contrast to the lack of CI, Fast et al.  
71 (2011) reported that a *wMau* variant increased *D. mauritiana* fecundity four-fold. This fecundity  
72 effect occurred in concert with *wMau*-induced alternations of programmed cell death in the  
73 germarium and of germline stem cell mitosis, providing insight into the mechanisms underlying  
74 increased egg production (Fast et al. 2011). However, the generality of these effects across  
75 *wMau* variants, and whether such extreme effects are plausible mechanisms of *wMau* spread,  
76 remains unknown.

77 Here, we assess the genetic and phenotypic basis of *w*Mau frequencies in *D. mauritiana* on  
78 Mauritius by combining analysis of *w*Mau draft genomes with analysis of *w*Mau effects on host  
79 fecundity and egg hatch. We identify a single mutation that we predict disrupts CI in *w*Mau,  
80 relative to its apparent sister *w*No. The loss of CI in the *w*Mau lineage is consistent with theory  
81 demonstrating that selection within host species does not act to increase or maintain the level of  
82 CI (Prout 1994; Turelli 1994; Haygood and Turelli 2009), but instead acts to increase  $F(1 - \mu)$ ,  
83 the product of *Wolbachia* effects on host fitness and maternal transmission efficiency (Turelli  
84 1994). The loss of CI helps explain the intermediate *w*Mau frequencies on Mauritius, reported by  
85 us and Giordano et al. (1995). We find no *w*Mau effects on host fecundity, suggesting that the  
86 results of Fast et al. (2011) may be anomalous. Indeed, theoretical analyses show that even a  
87 two-fold fecundity increase cannot be reconciled with the observed intermediate population  
88 frequencies, unless maternal *w*Mau transmission is exceptionally unreliable. Finally, we report  
89 the unexpected maintenance of two distinct classes of mtDNA haplotypes among *Wolbachia*-  
90 uninfected *D. mauritiana* and present theoretical analyses illustrating why this is unexpected.

91

## 92 **MATERIALS AND METHODS**

### 93 ***Drosophila* Husbandry and Stocks**

94 The *D. mauritiana* isofemale lines used in this study ( $N = 32$ ) were sampled from Mauritius in  
95 2006 by Margarita Womack and kindly provided to us by Prof. Daniel Matute at the University  
96 of North Carolina in Chapel Hill. Stocks were maintained on modified version of the standard  
97 Bloomington-cornmeal medium (Bloomington Stock Center, Bloomington, IN) and were kept at  
98 25°C, 12 light:12 dark photoperiod prior to the start of our experiments.

99

### 100 **Determining *Wolbachia* infection status and comparing infection frequencies**

101 DNA was extracted from each isofemale line using a standard ‘squish’ buffer protocol (Gloor et  
102 al. 1993), and infection status was determined using a polymerase chain reaction (PCR) assay  
103 (Simpliamp ThermoCycler, Applied Biosystems, Singapore). We used the GoTaq™ DNA  
104 Polymerase (Promega™, Wisconsin, USA) master mix, and PCR began with 3 minutes at 94°C,  
105 followed by 34 rounds of 30 seconds at 94°C, 30 seconds at 55°C, and 1 minute and 15 seconds  
106 at 72°C. The profile finished with 8 minutes at 72°C. We amplified the *Wolbachia*-specific *wsp*  
107 gene and a nuclear control region of the 2L chromosome; primers are listed in Supplementary

108 Table 1. PCR products were visualized using 1% agarose gels that included a molecular-weight  
109 ladder. Assuming a binomial distribution, we estimated exact 95% binomial confidence intervals  
110 for the infection frequencies on Mauritius. Using Fisher's Exact Test, we tested for temporal  
111 variation in  $w$ Mau frequencies by comparing our frequency estimate to a previous estimate  
112 (Giordano et al. 1995). All analyses were performed using R version 3.5.1 (R Team 2015).

113 We used quantitative PCR (qPCR) (MX3000P, Agilent Technologies, Germany) to confirm  
114 that tetracycline-treated flies were cleared of  $w$ Mau. DNA was extracted from *D. mauritiana*  
115 flies after four generations of tetracycline treatment, as described below. Our qPCR used a  
116 PowerUp™ SYBR™ Green Master Mix (Applied Biosystems™, California, USA). qPCR began  
117 with 2 minutes at 50°C and 10 minutes at 95°C, followed by 40 cycles of 10 seconds at 95°C and  
118 30 seconds at 60°C. We finished with 15 seconds at 95°C, 15 seconds at 55°C, and 15 seconds at  
119 95°C. Primers are listed in Supplementary Table 1.

120

#### 121 ***Wolbachia* DNA extraction, library preparation, and sequencing**

122 We sequenced  $w$ Mau-infected *R9*, *R29*, and *R60* *D. mauritiana* genotypes. Tissue samples for  
123 genomic DNA were extracted using a modified CTAB Genomic DNA Extraction protocol. Pools  
124 of flies ( $N = 5$ ), including males and females, were homogenized in 200  $\mu$ l CTAB solution  
125 (100mM Tris HCl pH 8.0, 10mM EDTA, 1.4M NaCl, CTAB 2% (w/v)) using motorized pestle.  
126 We incubated each sample for 10 min at 65°C, after which we added 200  $\mu$ l of chloroform;  
127 samples were then centrifuged at 13,000 rpm for 5 min at 4°C. We transferred the aqueous phase  
128 into a new tube, added 1:1 volume isopropanol, incubated samples on ice for 1 hr, and  
129 centrifuged them at 13,000 rpm for 30 min at 4°C. We discarded the supernatant, added 500  $\mu$ l  
130 70% EtOH, and then inverted the samples 2–3 times to re-suspend the pellets. Finally, we  
131 centrifuged the samples at 13,000 rpm for 15 min at 4°C, incubated at room temperature for 15  
132 min, and centrifuged again for 5 min. We discarded the ethanol and repeated these final steps.  
133 The resulting pellet was air dried at room temperature for 5 min and dissolved in 40  $\mu$ l 1 $\times$  TE  
134 Buffer.

135 DNA quantity was tested on an Implen Nanodrop (Implen, München, Germany) and total  
136 DNA was quantified by Qubit Fluorometric Quantitation (Invitrogen, Carlsbad, California,  
137 USA). DNA was cleaned using Agencourt AMPure XP beads (Beckman Coulter, Inc., Brea, CA,  
138 U.S.A), following manufacturers' instructions, and eluted in 50  $\mu$ l 1 $\times$  TE Buffer for shearing.

139 DNA was sheared using a Covaris E220 Focused Ultrasonicator (Covaris Inc., Woburn, MA) to  
140 a target size of 400 bp.

141 We prepared libraries using NEBNext® Ultra™ II DNA Library Prep with Sample  
142 Purification Beads (New England BioLabs, Ipswich, Massachusetts). End Preparation, Adaptor  
143 Ligation, Bead Clean-up with size selection, PCR Enrichment of Adaptor-Ligated DNA, and  
144 Clean-up of PCR Reaction were completed following the manufacturer's protocols. Final  
145 fragment sizes and concentrations were confirmed using a TapeStation 2200 system (Agilent,  
146 Santa Clara, California). We indexed samples using NEBNext® Multiplex Oligos for Illumina®  
147 (Index Primers Set 3 & Index Primers Set 4), and 10 µl of each sample was shipped to Novogene  
148 (Sacramento, CA) for sequencing using Illumina HiSeq 4000 (San Diego, CA), generating  
149 paired-end, 150 bp reads.

150

### 151 ***Wolbachia* assembly**

152 We obtained published reads ( $N = 6$ ) from Garrigan et al. (2014), and assembled these genomes  
153 along with the *R9*, *R29*, and *R60* genomes that we sequenced. Reads were trimmed using Sickle  
154 v. 1.33 (Joshi and Fass 2011) and assembled using ABySS v. 2.0.2 (Jackman et al. 2017). *K*  
155 values of 41, 51, 61, and 71 were used, and scaffolds with the best nucleotide BLAST matches to  
156 known *Wolbachia* sequences with E-values less than  $10^{-10}$  were extracted as the draft *Wolbachia*  
157 assemblies. We deemed samples infected if the largest *Wolbachia* assembly was at least 1  
158 million bases and uninfected if the largest assembly was fewer than 100,000 bases. No samples  
159 produced *Wolbachia* assemblies between 100,000 and 1 million bases. Of the six sets of  
160 published reads we analyzed (Garrigan et al. 2014), only lines *R31* and *R41* were *wMau*-infected.

161 To assess the quality of our draft assemblies, we used BUSCO v. 3.0.0 to search for  
162 orthologs of the near-universal, single-copy genes in the BUSCO proteobacteria database (Simao  
163 et al. 2015). As a control, we performed the same search using the reference genomes for *wRi*  
164 (Klasson et al. 2009), *wAu* (Sutton et al. 2014), *wMel* (Wu et al. 2004), *wHa* (Ellegaard et al.  
165 2013), and *wNo* (Ellegaard et al. 2013).

166

### 167 ***Wolbachia* gene extraction and phylogenetics**

168 To determine phylogenetic relationships and estimate divergence times, we obtained the public  
169 *Wolbachia* Supergroup B genomes of: *wAlbB* that infects *Aedes albopictus* (Mavingui et al.



170 2012), *wPip\_Pel* that infects *Culex pipiens* (Klasson et al. 2008), *wPip\_Mol* that infects *Culex*  
171 *molestus* (Pinto et al. 2013), *wNo* that infects *Drosophila simulans* (Ellegaard et al. 2013), and  
172 *wVitB* that infects *Nasonia vitripennis* (Kent et al. 2011), in addition to outgroup Supergroup A  
173 *wMel* that infects *D. melanogaster* (Wu et al. 2004). These previously published genomes and  
174 the five *wMau*-infected *D. mauritiana* genomes were annotated with Prokka v. 1.11, which  
175 identifies orthologs to known bacterial genes (Seemann 2014). To avoid pseudogenes and  
176 paralogs, we used only genes present in a single copy, and with no alignment gaps, in all of the  
177 genome sequences. Genes were identified as single copy if they uniquely matched a bacterial  
178 reference gene identified by Prokka v. 1.11. By requiring all orthologs to have identical length in  
179 all of the draft *Wolbachia* genomes, we removed all loci with indels. 143 genes, a total of  
180 113,943 bp, met these criteria when comparing all of these genomes. However, when our  
181 analysis was restricted to the five *wMau* genomes, our criteria were met by 694 genes, totaling  
182 704,613 bp. Including *wNo* with the five *wMau* genomes reduced our set to 671 genes with  
183 682,494 bp. We calculated the percent differences for the three codon positions within *wMau* and  
184 between *wMau* and *wNo*.

185 We estimated a Bayesian phylogram of the *Wolbachia* sequences with RevBayes 1.0.8  
186 under the GTR +  $\Gamma$  model, partitioning by codon position (Höhna et al. 2016). Four independent  
187 runs were performed, which all agreed.

188 We estimated a chronogram from the *Wolbachia* sequences using the absolute chronogram  
189 procedure implemented in Turelli et al. (2018). Briefly, we generated a relative relaxed clock  
190 chronogram with the GTR +  $\Gamma$  model with the root age fixed to 1 and the data partitioned by  
191 codon position. The relaxed clock branch rate prior was  $\Gamma(2,2)$ . We used substitution-rate  
192 estimates of  $\Gamma(7,7) \times 6.87 \times 10^{-9}$  substitutions/3<sup>rd</sup> position site/year to transform the relative  
193 chronogram into an absolute chronogram. This rate estimate was chosen so that the upper and  
194 lower credible intervals matched the posterior distribution estimated by Richardson et al. (2012),  
195 assuming 10 generations/year, normalized by their median estimate of  $6.87 \times 10^{-9}$  substitutions/3<sup>rd</sup>  
196 position site/year. (To assess the robustness of our conclusions to model assumptions, we also  
197 performed a strict-clock analysis and a relaxed-clock analysis with branch rate prior  $\Gamma(7,7)$ .) For  
198 each analysis, four independent runs were performed, which all agreed. Our analyses all support  
199 *wNo* as sister to *wMau*.



200 We also estimated a relative chronogram for the host species using the procedure  
201 implemented in Turelli et al. (2018). Our host phylogeny was based on the same 20 nuclear  
202 genes used in Turelli et al. (2018): *aconitase*, *aldolase*, *bicoid*, *ebony*, *enolase*, *esc*, *g6pdh*, *glyp*,  
203 *glys*, *ninaE*, *pepck*, *pgi*, *pgm*, *pic*, *ptc*, *tpi*, *transaldolase*, *white*, *wingless* and *yellow*.

### 205 **Analysis of *Wolbachia* and mitochondrial genomes**

206 We looked for copy number variation (CNV) between *wMau* and its closest relative, *wNo* across  
207 the whole *wNo* genome. Reads from the five infected *wMau* lines were aligned to the *wNo*  
208 reference (Ellegaard et al. 2013) with bwa 0.7.12 (Li and Durbin 2009). We calculated the  
209 normalized read depth for each alignment over sliding 1,000-bp windows by dividing the  
210 average depth in the window by the average depth over the entire *wNo* genome. The results were  
211 plotted and visually inspected for putative copy number variants (CNVs). The locations of CNVs  
212 were specifically identified with ControlFREEC v. 11.5 (Boeva et al. 2012), using a ploidy of  
213 one and a window size of 1,000. We calculated *P*-values for each identified CNV with the  
214 Wilcoxon Rank Sum and the Kolmogorov-Smirnov tests implemented in ControlFREEC.

215 We used BLAST to search for pairs of WO phage loci in *wMau* and *wNo* genomes that are  
216 known to cause and rescue CI. These include the orthologous loci pairs WD0631-632 and  
217 *wPa\_0282-283* that cause CI in *wMel* and in *wPip*, respectively (Beckmann and Fallon 2013;  
218 Beckmann et al. 2017; LePage et al. 2017). We also searched for the related *wPip wPa\_0294-295*  
219 pair (Beckmann et al. 2017). WD0631-632 and *wPa\_0282-283* orthologs have been referred to as  
220 Type I *cifA-B* pairs, and *wPa\_0294-295* as a Type IV *cifA-B* pair (LePage et al. 2017; Lindsey et  
221 al. 2018). Beckmann et al. (2017) refer to *wPa\_0282-283* as *cidA-B* and *wPa\_0294-295* as *cinA-*  
222 *B* based on their predicted function. *wNo\_RS01055* and *wNo\_RS01050* have been identified as a  
223 Type III *cifA-B* pair in the *wNo* genome (LePage et al. 2017; Lindsey et al. 2018). *No\_RS01055*  
224 and *wNo\_RS01050* are highly diverged from WD0631-632/*wPa\_0282-283* orthologs and from  
225 *wPa\_0294-295*; however, this *wNo* pair is more similar to *wPa\_0294-295* in terms of protein  
226 domains, lacking a ubiquitin-like protease domain (Lindsey et al. 2018).

227 We found only the *wNo\_RS01050/wNo\_RS01055* pair in *wMau* genomes. The orthologs for  
228 *wNo\_RS01050* and *wNo\_RS01055* were extracted from our draft *wMau* assemblies and aligned  
229 with MAFFT v. 7 (Kato and Standley 2013). We compared these orthologs to

230 *wNo\_RS01050/wNo\_RS01055* in *wNo* and checked for single nucleotide variants (SNVs)  
231 among our *wMau* assemblies.

232 *D. mauritiana* carry either the *maI* mitochondrial haplotype, associated with *wMau*  
233 infections, or the *maII* haplotype (Ballard 2000a; James and Ballard 2000). To determine the  
234 mitochondrial haplotype of each *D. mauritiana* line, we assembled the mitochondrial genomes  
235 by down-sampling the reads by a factor of 100, then assembling with ABySS 2.0.2 using a *K*  
236 value of 71 for our data (150 bp reads) and 35 for the published data (76 bp reads) (Garrigan et  
237 al. 2014). Down-sampling reads prevents the nuclear genome from assembling but does not  
238 inhibit assembly of the mitochondrial genome, which has much higher coverage. We deemed the  
239 mitochondrial assembly complete if all protein-coding genes ( $N = 13$ ) were present on the same  
240 contig and in the same order as in *D. melanogaster*. If the first attempt did not produce a  
241 complete mitochondrial assembly, we adjusted the down-sampling fraction until a complete  
242 assembly was produced for each line.

243 Annotated reference mitochondrial sequences for the *D. mauritiana* mitochondrial  
244 haplotypes *maI* and *maII* were obtained from Ballard et al. (2000b), and the thirteen protein-  
245 coding genes were extracted from our assemblies using BLAST and aligned to these references.  
246 The *maI* and *maII* reference sequences differ at 343 nucleotides over these protein-coding  
247 regions. We identified our lines as carrying the *maI* haplotype if they differed by fewer than five  
248 nucleotides from the *maI* reference and as *maII* if they differed by fewer than five nucleotides  
249 from the *maII* reference. None of our assemblies differed from both references at five or more  
250 nucleotides.

251

## 252 ***wMau* phenotypic analyses**

253 Previous analyses have demonstrated that *wMau* does not cause CI (Giordano et al. 1995). To  
254 check the generality of this result, we reciprocally crossed *wMau*-infected *R3I D. mauritiana*  
255 with uninfected *R4* and measured egg hatch. Flies were reared under controlled conditions at  
256 25°C for multiple generations leading up to the experiment. We paired 1–2-day-old virgin  
257 females with 1–2-day-old males in a vial containing spoons with cornmeal media and yeast  
258 paste. After 24 hr, pairs were transferred to new spoons, and this process was repeated for five  
259 days. Eggs on each spoon were given 24 hr at 25°C to hatch after flies were removed. To test for  
260 CI, we used nonparametric Wilcoxon tests to compare egg hatch between reciprocal crosses that

261 produced at least 10 eggs. All experiments were carried out at 25°C with a 12 light:12 dark  
262 photoperiod.

263 To determine if *wMau* generally enhances *D. mauritiana* fecundity, we assayed the  
264 fecundity of *wMau*-infected and uninfected *D. mauritiana* genotypes generated from reciprocal  
265 crosses. Two *wMau*-infected isofemale lines (*R31* and *R41*) were each reciprocally crossed to an  
266 uninfected line (*R4*) to generate infected and uninfected F<sub>1</sub> females with similar genetic  
267 backgrounds. The *wMau*-infected and uninfected F<sub>1</sub> females were collected as virgins and placed  
268 in holding vials. We paired 3–7-day-old females individually with an uninfected-*R4* male (to  
269 stimulate oviposition) in vials containing a small spoon filled with standard cornmeal medium  
270 and coated with a thin layer of yeast paste. We allowed females to lay eggs for 24 hours, after  
271 which pairs were transferred to new vials. This was repeated for five days. At the end of each 24  
272 hr period, spoons were frozen until counted. All experiments were carried out at 25°C with a 12  
273 light:12 dark photoperiod.

274 We also assessed whether *D. mauritiana* genomic backgrounds modify *wMau* fecundity  
275 effects. We backcrossed *R31 wMau* into the *R41 D. mauritiana* nuclear background by crossing  
276 *R31* females with *R41* males. F<sub>1</sub> females were then backcrossed to *R41* males—this was repeated  
277 for four generations to generate the *R41<sup>R31</sup>* genotypes (*wMau* variant denoted by superscripts). A  
278 similar approach was taken to generate *R31<sup>R41</sup>* genotypes. Each of these genotypes were then  
279 reciprocally crossed to the uninfected *R4* line to generate infected and uninfected F<sub>1</sub> females with  
280 controlled nuclear-genetic backgrounds. Upon emergence the *wMau*-infected and uninfected F<sub>1</sub>  
281 females were collected as virgins and placed in holding vials. 3–7-day-old females were then  
282 paired individually with an uninfected-*R4* male to stimulate oviposition, and egg-lay experiments  
283 were carried out over five days as described above.

284 To determine if *wMau* fecundity effects depend on host age, we measured egg lay of *wMau*-  
285 infected and uninfected *R31* genotypes over 24 days. Fast et al. (2011) carried out their  
286 experiments over several weeks, which encouraged us to do the same. In an effort to more  
287 closely mimic their approach, we generated tetracycline-treated *R31* genotypes (*R31-tet*) to  
288 compare to infected *R31* genotypes. We fed flies 0.03% tetracycline concentrated medium for  
289 four generations. We screened F<sub>1</sub> and F<sub>2</sub> individuals for *wMau* using PCR, and we then fed flies  
290 tetracycline food for two additional generations. In the fourth generation, we assessed *wMau* titer  
291 using qPCR to confirm that each genotype was cleared of *wMau* infection. Following

292 tetracycline treatment, we placed *R31 D. mauritiana* males in food vials and allowed them to eat  
293 and defecate for 48 hours. We removed males, and *R31-tet* individuals were then placed in these  
294 same vials to reestablish the gut microbiome. Flies were given at least three more generations to  
295 avoid detrimental effects of tetracycline treatment on mitochondrial function (Ballard and  
296 Melvin 2007). To assay age effects on fecundity, we paired individual 6–7-day-old virgin *R31* ( $N$   
297 = 30) and *R31-tet* ( $N$  = 30) females in bottles on yeasted apple-juice agar plates with an *R4* male  
298 to stimulate oviposition. Pairs were placed on new egg-lay plates every 24 hrs. After two weeks,  
299 we added one or two additional *R4* males to each bottle to replace any dead males and to ensure  
300 that females were not sperm limited as they aged.

301 To test for effects of  $wMau$  on host fecundity, we used nonparametric Wilcoxon tests to  
302 compare the number of eggs laid between infected and uninfected females produced by  
303 reciprocally crossing *R31*, *R41*, *R3<sup>R41</sup>*, and *R41<sup>R31</sup>* with uninfected *R4*. We also used Wilcoxon  
304 tests to assess variation in fecundity between infected-*R31* and uninfected-*R31-tet* genotypes  
305 across all 24 days of egg lay in our final experiment. We then assessed variation in *R31* and *R31-*  
306 *tet* egg lay across several ages to identify fecundity effects that vary with female age. Finally, we  
307 estimated the fitness parameter  $F$  in the standard discrete-generation model of CI to determine if  
308  $wMau$  fecundity effects underlie low frequency spread (Hoffmann et al. 1990; Turelli 1994).  
309 Pairs that laid fewer than 10 eggs across each experiment were excluded from analyses, but our  
310 results are robust to this threshold.

311

## 312 **RESULTS**

### 313 ***Wolbachia* infection status**

314 Out of 32 *D. mauritiana* lines that we analyzed, 11 were infected with  $wMau$  *Wolbachia*  
315 (infection frequency = 0.34; binomial confidence interval: 0.19, 0.53). This new frequency  
316 estimate is not statistically different from a previous estimate (Giordano et al. 1995: infection  
317 frequency, 0.46; binomial confidence interval, (0.34, 0.58); Fisher’s Exact Test,  $P$  = 0.293).  
318 These relatively low infection frequencies are consistent with theoretical expectations given that  
319  $wMau$  does not cause CI (Giordano et al. 1995; our data reported below), as *Wolbachia* that  
320 cause significant CI produce high equilibrium infection frequencies (Kriesner et al. 2016).  
321 Intermediate and apparently stable  $wMau$  frequencies on Mauritius suggest that  $wMau$  persists at  
322 a balance between positive effects on host fitness and imperfect maternal transmission.

323 Quantitative predictions, based on the idealized model of Hoffmann and Turelli (1997), are  
324 discussed below. The maintenance of *wMau* is analogous to the persistence of other non-CI-  
325 causing *Wolbachia*, specifically *wSuz* in *D. sukuzii* and *wSpc* in *D. subpulchrella* (Hamm et al.  
326 2014; Conner et al. 2017; Turelli et al. 2018) and *wAu* in some Australian populations of *D.*  
327 *simulans* (Hoffmann et al. 1996; Kriesner et al. 2013).

328

### 329 **Draft *wMau* genome assemblies and comparison to *wNo***

330 The five *wMau* draft genomes we assembled were of very similar quality (Supplemental Table  
331 2). N50 values ranged from 60,027 to 63,676 base pairs, and our assemblies varied in total length  
332 from 1,266,004 bases to 1,303,156 bases (Supplemental Table 2). Our BUSCO search found  
333 exactly the same genes in each draft assembly, and the presence/absence of genes in our *wMau*  
334 assemblies was comparable to those in the complete genomes used as controls (Supplemental  
335 Table 3). In comparing our five *wMau* draft genomes over 694 single-copy, equal-length loci  
336 comprising 704,613 bp, we found only one SNP. Four sequences (*R9*, *R31*, *R41* and *R60*) are  
337 identical at all 704,613 bp. *R29* differs from them at a single nucleotide, a nonsynonymous  
338 substitution in a locus which Prokka v. 1.11 annotates as “bifunctional DNA-directed RNA  
339 polymerase subunit beta/beta.”

340 Comparing these five *wMau* sequences to the *wNo* reference (Ellegaard et al. 2013) over  
341 671 genes with 682,494 bp, they differ by 0.068% overall, with equivalent divergence at all three  
342 codon positions (0.067%, 0.061%, and 0.076%, respectively).

343

### 344 ***Wolbachia* phylogenetics**

345 As expected from the sequence comparisons, our Supergroup B phylogram places *wMau* sister to  
346 *wNo* (Figure 1A). This is consistent with previous analyses using fewer loci that placed *wMau*  
347 (or *wMa* in *D. simulans*) sister to *wNo* (James and Ballard 2000; Zabalou et al. 2008; Toomey et  
348 al. 2013). Our chronogram (Figure 1B) estimates the 95% credible interval for the split between  
349 the Supergroup B versus Subgroup A *Wolbachia* strains as 6 to 36 mya (point estimate = 16  
350 mya). Reducing the variance on the substitution-rate-variation prior by using  $\Gamma(7,7)$  rather than  
351  $\Gamma(2,2)$ , changes the credible interval for the A-B split to 8 to 46 mya (point estimate = 21 mya);  
352 in contrast, a strict clock analysis produces a credible interval of 12 to 64 mya (point estimate =  
353 31 mya). These estimates are roughly comparable to an earlier estimate that used a general

354 estimate for the synonymous substitution rate in bacteria (Ochman and Wilson 1987) and only  
 355 the *ftsZ* locus (59–67 mya, Werren et al. 1995). However, they are much lower than a recent  
 356 estimate based on comparative genomics (217 mya, Gerth and Bleidorn 2016). We discuss this  
 357 discrepancy below.  
 358

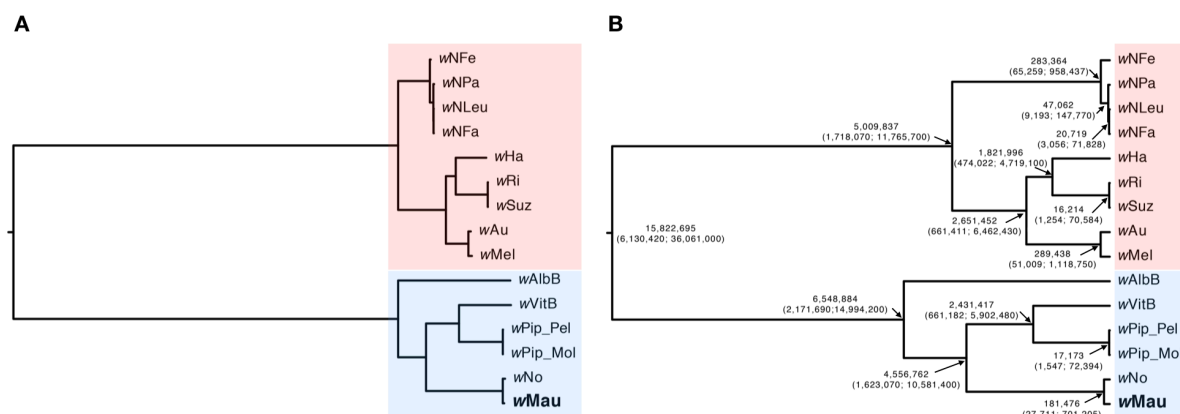

**Figure 1. A)** An estimated phylogram for various Supergroup A (red) and Supergroup B (blue) *Wolbachia* strains. All nodes have Bayesian posterior probabilities of 1. The phylogram shows significant variation in the substitution rates across branches, with long branches separating the A and B clades. **B)** An estimated chronogram for the same strains, with estimated divergence times and their confidence intervals at each node. To obtain these estimates, we generated a relative relaxed clock chronogram with the GTR +  $\Gamma$  model with the root age fixed to 1, the data partitioned by codon position, and with a  $\Gamma(2,2)$  branch rate prior. We used substitution-rate estimates of  $\Gamma(7,7) \times 6.87 \times 10^{-9}$  substitutions/3<sup>rd</sup> position site/year to transform the relative chronogram into an absolute chronogram.

359  
 360 The observed divergence between wNo and wMau is consistent across all three codon  
 361 positions, similar to other recent *Wolbachia* splits (Turelli et al. 2018). Conversely, observed  
 362 divergence at each codon position generally varies across the chronogram, leading to inflation of  
 363 the wNo-wMau divergence point estimate of approximately 181,000 years (credible interval =  
 364 28,000 to 701,000 years; Figure 1B). To obtain a more accurate estimate, we calculated wNo-  
 365 wMau divergence using the observed third position pairwise divergence (0.077%, or 0.039%  
 366 from tip to MRCA) and Richardson et al. (2012)’s rate estimate. This approach produces a point  
 367 estimate of 57,000 years, with a credible interval of 30,000 to 135,000 years for the wNo-wMau  
 368 split, which seems plausible.  
 369  
 370



371 **Analysis of *Wolbachia* and mitochondrial genomes**

372 We looked for CNVs in *w*Mau relative to sister *w*No by plotting normalized read depth along the  
373 *w*No genome. There were no differences in copy number among the *w*Mau variants, but  
374 compared to *w*No, ControlFREEEC identified four regions deleted from all *w*Mau that were  
375 significant according to the Wilcoxon Rank Sum and Kolmogorov-Smirnov tests (Figure 2 and  
376 Table 1). These deleted regions of the *w*Mau genomes include many genes, including many  
377 phage-related loci, listed in Supplementary Table 4.

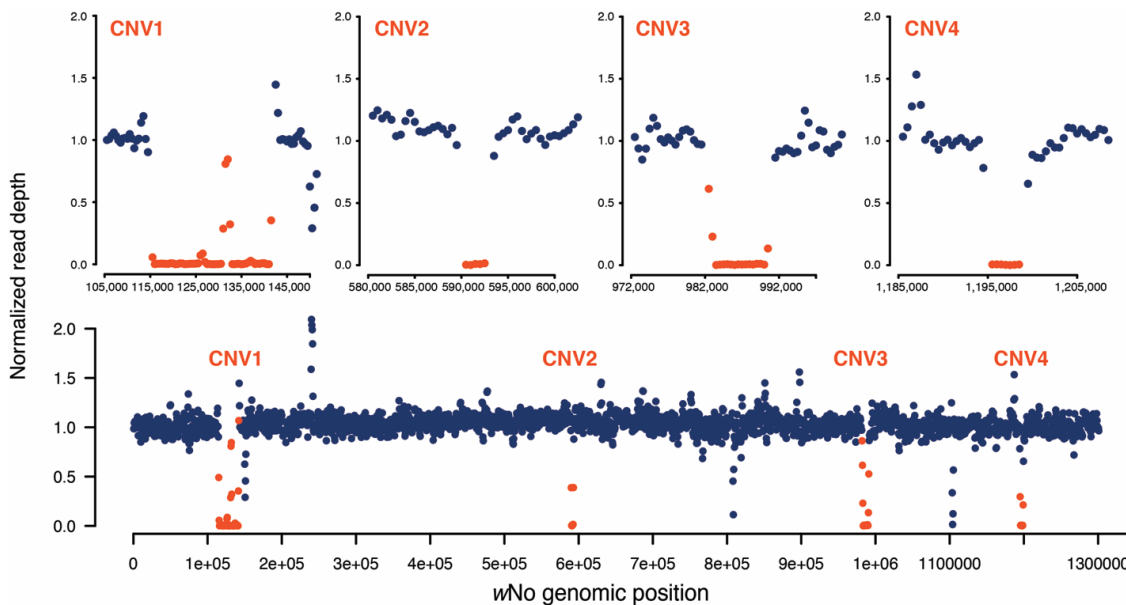

**Figure 2.** All *w*Mau variants share four large deletions, relative to sister *w*No. Top panel) The normalized read depth for *w*Mau *R60* plotted across the four focal regions of the *w*No reference genome; 10 kb of sequence surrounding regions are plotted on either side of each region. Bottom panel) The normalized read depth of *w*Mau *R60* plotted across the whole *w*No reference genome. Regions that do not contain statistically significant CNVs are plotted in dark blue, and regions with significant CNVs are plotted in red. All *w*Mau variants share the same CNVs, relative to *w*No.

378

379 To test the hypothesis that loci known to underlie CI are disrupted, we searched for pairs of  
380 loci known to be associated with CI and found orthologs to the Type III gene pair  
381 *w*No\_RS01050-1055 in each of our draft assemblies, but we did not find orthologs to the  
382 WD0631-632/*w*Pip\_0282-283 pairs or to the *w*Pip\_0294-295 pair. There were no variable sites  
383 in the *w*No\_RS01050-1055 gene regions among our five *w*Mau assemblies. All *w*Mau variants  
384 share a one base pair deletion at base 1133 out of 2091 (amino acid 378) in the *w*No\_RS01050



385 gene, relative to this same region in the *wNo* genome. This frameshift introduces over ten stop  
 386 codons, with the first at amino acid 388, likely making this predicted CI-causing protein  
 387 nonfunctional. We also identified a nonsynonymous substitution in amino acid 264 of  
 388 *wNo\_RS01050* (*wNo* codon ACA, Thr; *wMau* codon AUA, Ile) and two SNVs in  
 389 *wNo\_RS01055*: a synonymous substitution in amino acid 365 (*wNo* codon GUC, *wMau* codon  
 390 GUU) and a nonsynonymous substitution in amino acid 397 (*wNo* codon GCU, amino acid Ala;  
 391 *wMau* codon GAU, amino acid Asp). While one might intuitively expect selection to favor CI,  
 392 disruption of CI in *wMau* is consistent with theoretical analyses showing that selection within a  
 393 host species does not act directly on the level of CI (Prout 1994; Turelli 1994; Haygood and  
 394 Turelli 2009). Instead, selection should act to increase the product of *Wolbachia* effects on host  
 395 fitness and the efficiency of maternal transmission (Turelli 1994).  
 396

**Table 1.** Copy number variants in *wMau* relative to sister *wNo*. Genomic positions are based on the *wNo* reference. There were no CNVs among *wMau* variants.

| Start     | End       | Change | Wilcoxon Rank Sum Test | Kolmogorov-Smirnov Test |
|-----------|-----------|--------|------------------------|-------------------------|
| 115,000   | 142,000   | 1 → 0  | < 0.0001               | < 0.0001                |
| 590,000   | 593,000   | 1 → 0  | 0.0027                 | 0.0050                  |
| 982,000   | 991,000   | 1 → 0  | < 0.0001               | < 0.0001                |
| 1,195,000 | 1,199,000 | 1 → 0  | 0.0005                 | 0.0007                  |

397  
 398 Of the *D. mauritiana* lines tested ( $N = 9$ ), one line (uninfected-*R44*) carries the *maII*  
 399 mitochondrial haplotype, while the other eight carry *maI*. The *maI* and *maII* references differ by  
 400 343 SNVs across the proteome, and *R44* differs from the *maII* reference by 4 SNVs in the  
 401 proteome. Four of our *maI* lines (*R23*, *R29*, *R32*, and *R39*) are identical to the *maI* reference,  
 402 while three (*R31*, *R41*, and *R60*) have one SNV and one (*R9*) has two SNVs relative to *maI*  
 403 reference. One SNV is shared between *R9* and *R60*, but the other three SNVs are unique. Our  
 404 results agree with past analyses that found *wMau* is perfectly associated with the *maI*  
 405 mitochondrial haplotype (Ballard 2000a; James and Ballard 2000). The presence of *maII* among  
 406 the uninfected is interesting. In contrast to *maI*, which is associated with introgression with *D.*  
 407 *simulans* (Ballard 2000a; James and Ballard 2000), *maII* appears as an outgroup on the mtDNA  
 408 phylogeny of the *D. simulans* clade and is not associated with *Wolbachia* (Ballard 2000b, Fig. 5;  
 409 James and Ballard 2000). Whether or not *Wolbachia* cause CI, if they are maintained by

410 selection-imperfect-transmission balance, we expect all uninfected flies to eventually carry the  
411 mtDNA associated with infected mothers (Turelli et al. 1992). We present a mathematical  
412 analysis of the persistence of *maII* below.

413

#### 414 **Analysis of *wMau* phenotypes**

415 *wMau* is reported to not cause CI (Giordano et al. 1995), but a single *wMau*-infected *D.*  
416 *mauritiana* genotype displayed a four-fold increase in egg lay relative to an uninfected  
417 counterpart (Fast et al. 2011). We sought to determine whether *wMau* can cause CI and whether  
418 *wMau* generally increases *D. mauritiana* fecundity. In agreement with past analyses, we found  
419 no difference between the egg hatch of uninfected females crossed to *wMau*-infected males ( $0.34$   
420  $\pm 0.23$  SD,  $N = 25$ ) and the reciprocal cross ( $0.29 \pm 0.28$  SD,  $N = 24$ ). Contrary to previous  
421 results, we find no evidence for *wMau* effects on *D. mauritiana* fecundity (Table 2 and Figure 3),  
422 regardless of host genetic backgrounds. Across both experiments assessing *wMau* fecundity  
423 effects in their natural backgrounds (*R3I* and *R4I*), we counted 27,221 eggs and found no  
424 difference in the number of eggs laid by infected (mean = 238.20, SD = 52.35,  $N = 60$ ) versus  
425 uninfected (mean = 226.82, SD = 67.21,  $N = 57$ ) females over the five days of egg lay (Wilcoxon  
426 test,  $W = 1540.5$ ,  $P = 0.357$ ). Across both experiments that assessed *wMau* fecundity effects in  
427 novel host backgrounds (*R3I<sup>R4I</sup>* and *R4I<sup>R3I</sup>*), we counted 30,358 eggs and found no difference in  
428 the number of eggs laid by infected (mean = 253.30, SD = 51.99,  $N = 60$ ) versus uninfected  
429 (mean = 252.67, SD = 63.53,  $N = 60$ ) females over five days (Wilcoxon test,  $W = 1869.5$ ,  $P =$   
430  $0.719$ ). [The mean number of eggs laid over 5 days, standard deviation (SD), sample size ( $N$ ),  
431 and  $P$ -values from Wilcoxon tests are presented in Table 2 for all pairs.]

432 We sought to determine if *wMau* fecundity effects depend on host age with a separate  
433 experiment that assessed egg lay over 24 days on apple-agar plates, similar to Fast et al. (2011).  
434 Across all ages, we counted 9,459 eggs and found no difference in the number of eggs laid by  
435 infected (mean = 187.70, SD = 168.28,  $N = 27$ ) versus uninfected (mean = 156.29, SD = 138.04,  
436  $N = 28$ ) females (Wilcoxon test,  $W = 409$ ,  $P = 0.608$ ). This pattern was consistent across  
437 different age classes, suggesting age has little influence on *wMau* fecundity effects (Table 3 and  
438 Figure 4). (The mean number of eggs laid, SD,  $N$ , and  $P$ -values from Wilcoxon tests are  
439 presented in Table 3 for all age classes.)

440

**Table 2.** *w*Mau does not significantly affect *D. mauritiana* fecundity in comparisons of paired infected (I) and uninfected (U) strains sharing host nuclear backgrounds. *N* is the number of females that produced the means and SDs. *P* values are for two-tailed Wilcoxon tests. Cytoplasm sources are denoted with superscripts for introgressed strains.

| Strain                    | Mean eggs laid/5 days | SD    | <i>N</i> | <i>P</i> value |
|---------------------------|-----------------------|-------|----------|----------------|
| <i>R3II</i>               | 210.97                | 55.22 | 30       | 0.901          |
| <i>R3IU</i>               | 213.50                | 58.43 | 28       |                |
| <i>R4II</i>               | 265.43                | 31.47 | 30       | 0.355          |
| <i>R4IU</i>               | 239.69                | 73.43 | 29       |                |
| <i>R3I<sup>R4I</sup>I</i> | 257.83                | 58.15 | 30       | 0.762          |
| <i>R3I<sup>R4I</sup>U</i> | 254.67                | 48.72 | 30       |                |
| <i>R4I<sup>R3I</sup>I</i> | 248.77                | 45.54 | 30       | 0.433          |
| <i>R4I<sup>R3I</sup>U</i> | 250.67                | 76.35 | 30       |                |

441

**Table 3.** *w*Mau-infected (I) and uninfected (U) *D. mauritiana* females do not vary in egg lay at any of the age classes assessed. *N* is the number of females that produced the means and SDs. *P* values are for two-tailed Wilcoxon tests.

| Egg lay period | Infection status | Mean eggs laid/5 days | SD    | <i>N</i> | <i>P</i> value |
|----------------|------------------|-----------------------|-------|----------|----------------|
| Days 1-5       | I                | 63.41                 | 44.62 | 27       | 0.255          |
|                | U                | 79.46                 | 57.98 | 26       |                |
| Days 6-10      | I                | 64.80                 | 38.43 | 20       | 0.172          |
|                | U                | 83.35                 | 46.75 | 20       |                |
| Days 11-15     | I                | 66.17                 | 40.72 | 12       | 0.571          |
|                | U                | 61.0                  | 49.09 | 14       |                |
| Days 16-20     | I                | 47.56                 | 21.45 | 9        | 0.555          |
|                | U                | 50.83                 | 48.76 | 6        |                |
| Days 21-24     | I                | 21.50                 | 14.73 | 4        | 0.384          |
|                | U                | 29.0                  | 16.51 | 4        |                |

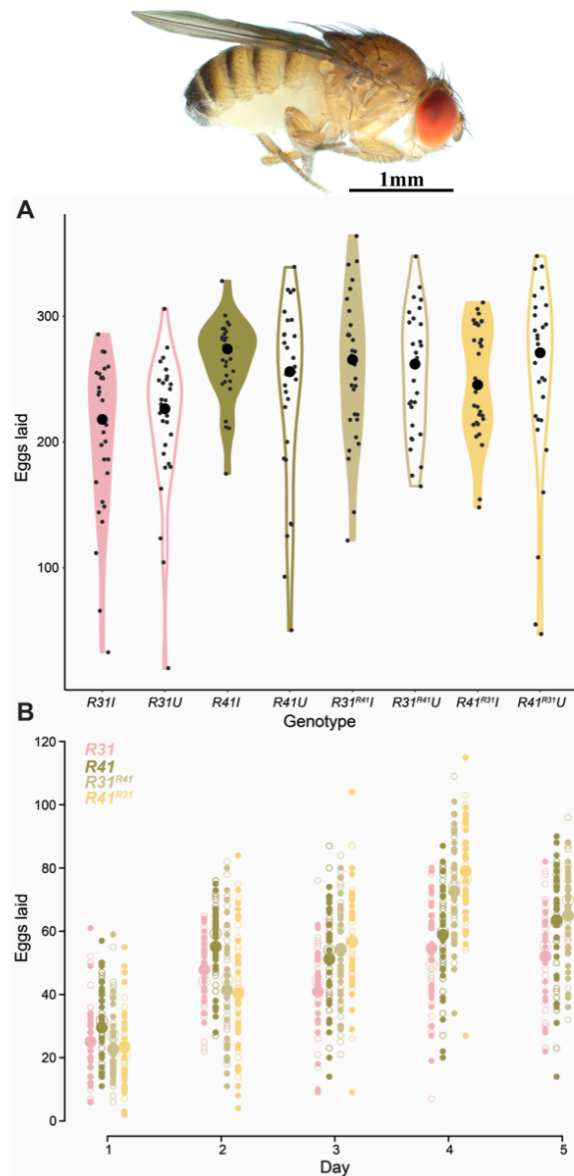

**Figure 3.** *wMau* infections do not influence the number of eggs laid by *D. mauritiana* females (top) regardless of host genomic background. **A)** Violin plots of the number of eggs laid by *D. mauritiana* females over five days when infected with their natural *wMau* variant (*R31I* and *R41I*), when infected with a novel *wMau* variant (*R31<sup>R41I</sup>* and *R41<sup>R31I</sup>*), and when uninfected (*R31U*, *R41U*, *R31<sup>R41U</sup>*, and *R41<sup>R31U</sup>*). Large black dots are medians, and small black dots are the eggs laid by each replicate over five days. **B)** The daily egg lay of these same infected (solid circles) and uninfected (open circles) strains is reported. Large circles are means of all replicates, and small circles are the raw data. Only days where females laid at least one egg are plotted. Cytoplasm sources are denoted by superscripts for the reciprocally introgressed strains.

443 With these data, we estimated the fitness parameter  $F$  in the standard discrete-generation  
444 model of CI (Hoffmann et al. 1990; Turelli 1994). Taking the ratio of replicate mean fecundity  
445 observed for  $w$ Mau-infected females to the replicate mean fecundity of uninfected females in  
446 naturally sampled  $R3I$  and  $R4I$  *D. mauritiana* backgrounds, we estimated  $F = 1.05$  (95%  $BC_a$   
447 interval: 0.96, 1.16). Following reciprocal introgression of  $w$ Mau and host backgrounds (i.e., the  
448  $R3I^{R4I}$  and  $R4I^{R3I}$  genotypes), we estimated  $F = 1.0$  (95%  $BC_a$  interval: 0.93, 1.09). Finally,  
449 across all 24 days of our age-effects experiment, we estimated  $F = 0.83$ , 95%  $BC_a$  interval: 0.52,  
450 1.34) for  $R3I$ , which overlaps with our estimate of  $F$  for  $R3I$  in our initial experiment (Table 4).  
451 Thus, and in support of our other analyses, there is little evidence that  $w$ Mau increases  $F$  to  
452 encourage spread.  $BC_a$  confidence intervals were calculated using the two-sample acceleration  
453 constant given by equation 15.36 of Efron and Tibshirani (1993). (Estimates of  $F$  and the  
454 associated  $BC_a$  confidence intervals are reported in Table 4 for different strains and age classes.)  
455 Our mathematical analysis below show that large fitness advantages associated with  $w$ Mau are  
456 inconsistent with the lack of CI and plausible levels of imperfect transmission.

457

458

**Table 4.** Estimates of the fitness parameter  $F$  in the standard discrete-generation model of CI indicate that  $w$ Mau fecundity effects have little influence on spread from low frequencies.

| <b><math>w</math>Mau variant/age class</b> | <b><math>F</math></b> | <b>95% <math>BC_a</math> interval</b> |
|--------------------------------------------|-----------------------|---------------------------------------|
| <i>R3I</i>                                 | 0.988                 | (0.862, 1.137)                        |
| <i>R4I</i>                                 | 1.107                 | (0.995, 1.265)                        |
| <i>R3I<sup>R4I</sup></i>                   | 1.012                 | (0.911, 1.122)                        |
| <i>R4I<sup>R3I</sup></i>                   | 0.992                 | (0.884, 1.143)                        |
| <i>R3I</i> /Days 1-5                       | 1.253                 | (0.845, 1.844)                        |
| <i>R3I</i> /Days 6-10                      | 1.286                 | (0.907, 1.836)                        |
| <i>R3I</i> /Days 11-15                     | 0.923                 | (0.531, 1.577)                        |
| <i>R3I</i> /Days 16-20                     | 1.069                 | (0.391, 2.11)                         |
| <i>R3I</i> /Days 21-24                     | 1.349                 | (0.60, 2.813)                         |

459

460

461

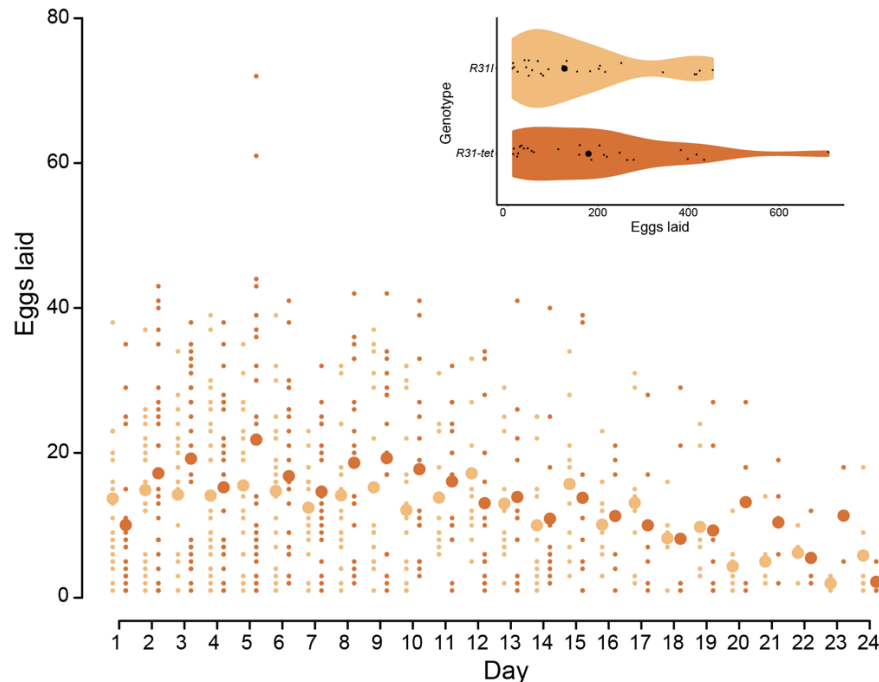

**Figure 4.** The mean number of eggs laid by infected *R31* (*R31I*, large tan dots) and *R31-tet* (large orange dots) are similar regardless of host age. Egg counts for each replicate are also plotted (small dots). Violin plots show egg lay across all ages for each genotype; large black circles are medians, and small black circles are the number of eggs laid by each replicate.

462

463

#### 464 **Mathematical analyses of *Wolbachia* frequencies and mtDNA polymorphism**

465 If *Wolbachia* do not cause CI (or any other reproductive manipulation), their dynamics can be  
466 approximated by a discrete-generation haploid selection model. Following Hoffmann and Turelli  
467 (1997), we assume that the relative fecundity of *Wolbachia*-infected females is  $F$ , but a fraction  
468  $\mu$  of their ova do not carry *Wolbachia*. Given our ignorance of the nature of *Wolbachia*'s  
469 favorable effects, the  $F$  represents an approximation for all possible fitness benefits. If  $F(1 - \mu) >$   
470 1, the equilibrium *Wolbachia* frequency among adults is

471

$$472 \quad \hat{p} = 1 - \frac{\mu F}{F - 1}, \quad (1)$$

473

474 Imperfect maternal transmission has been documented for field-collected *D. simulans* infected  
475 with *w*Ri (Hoffmann and Turelli 1988; Turelli and Hoffmann 1995; Carrington et al. 2011), *D.*

476 *melanogaster* infected with  $w_{\text{Mel}}$  (Hoffmann et al. 1998) and *D. suzukii* infected with  $w_{\text{Suz}}$   
477 (Hamm et al. 2014). The estimates range from about 0.01 to 0.1. In order for the equilibrium  
478 *Wolbachia* frequency to be below 0.5, approximation (1) requires that the relative fecundity of  
479 infected females satisfies

$$481 \quad F < \frac{1}{1 - 2\mu}. \quad (2)$$

482  
483 Thus, even for  $\mu$  as large as 0.15, which exceeds essentially all estimates of maternal transmission  
484 failure from nature, *Wolbachia* can increase fitness by at most 43% and produce an equilibrium  
485 frequency below 0.5. Conversely, (1) implies that a doubling of relative fecundity by *Wolbachia*  
486 would produce an equilibrium frequency  $1 - 2\mu$ . If  $\mu \leq 0.25$ , consistent with all available data,  
487 the predicted equilibrium implied by a fitness doubling significantly exceeds the observed  
488 frequency of  $w_{\text{Mau}}$ . Hence, a four-fold fecundity effect, as described by Fast et al. (2011), is  
489 inconsistent with the frequency of  $w_{\text{Mau}}$  in natural populations of *D. mauritiana*. Field estimates  
490 of  $\mu$  for *D. mauritiana* will provide better theory-based bounds on  $w_{\text{Mau}}$  fitness effects.

491 As noted by Turelli et al. (1992), if *Wolbachia* is introduced into a population along with a  
492 diagnostic mtDNA haplotype that has no effect on fitness, imperfect *Wolbachia* maternal  
493 transmission implies that all infected and uninfected individuals will eventually carry the  
494 *Wolbachia*-associated mtDNA, because all will have had *Wolbachia*-infected maternal ancestors.  
495 We conjectured that a stable mtDNA polymorphism might be maintained if a *Wolbachia*-  
496 associated mtDNA introduced by introgression is deleterious in its new nuclear background. We  
497 refute our conjecture in Appendix 1. We show that the condition for *Wolbachia* to increase when  
498 rare,  $F(1 - \mu) > 1$ , ensures that the native mtDNA will be completely displaced by the  
499 *Wolbachia*-associated mtDNA, even if it lowers host fitness once separated from *Wolbachia*.

500 How fast is the mtDNA turnover, among *Wolbachia*-uninfected individuals, as a new  
501 *Wolbachia* invades? This is easiest to analyze when the mtDNA introduced with *Wolbachia* has  
502 no effect on fitness, so that the relative fitness of *Wolbachia*-infected versus uninfected  
503 individuals is  $F$ , irrespective of the mtDNA haplotype of the uninfected individuals. As shown in  
504 Appendix 1, the frequency of the ancestral mtDNA haplotype among uninfected individuals,  
505 denoted  $r_t$ , declines as



506

$$507 \quad r_{t+1} = r_t/[F(1 - \mu)]. \quad (3)$$

508

509 Assuming  $r_0 = 1$ , recursion (3) implies that even if  $F(1 - \mu)$  is only 1.01, the frequency of the  
510 ancestral mtDNA haplotype should fall below  $10^{-4}$  after 1000 generations. A much more rapid  
511 mtDNA turnover was seen as the CI-causing *w*Ri swept northward through California  
512 populations of *D. simulans* (Turelli et al. 1992; Turelli and Hoffmann 1995). Thus, it is  
513 anomalous that mtDNA haplotype *ma*II, which seems to be ancestral in *D. mauritiana* (Rousset  
514 and Solignac 1995; Ballard 2000a), persists among *Wolbachia*-uninfected *D. mauritiana*, given  
515 that all sampled *Wolbachia*-infected individuals carry *ma*I.

516

## 517 **DISCUSSION**

518 Understanding the genetic and phenotypic basis of *Wolbachia* frequencies in nature remains  
519 challenging and is particularly interesting for strains like *w*Mau that persist without inducing CI.  
520 Our results demonstrate intermediate and apparently stable *w*Mau frequencies on Mauritius,  
521 consistent with no CI. The lack of *w*Mau CI probably depends at least in part on the one-base-  
522 pair deletion that we identified in the *w*No\_RS01050 gene. This mutation introduces a frameshift  
523 and more than ten stop codons, relative to sister *w*No, that we predict disrupt CI in *w*Mau. We  
524 also find no *w*Mau fecundity effects, indicating that *w*Mau must persist with unknown positive  
525 fitness effects balancing imperfect maternal transmission. We discuss the implications of our  
526 findings below.

527

### 528 ***w*Mau is sister to *w*No and diverged from Supergroup A *Wolbachia* less than 100 mya**

529 Our phylogenetic analyses place *w*Mau sister to *w*No, in agreement with past analyses using  
530 fewer data (James and Ballard 2000; Zabalou et al. 2008; Toomey et al. 2013). The relationships  
531 we infer agree with those from recently published phylograms (Gerth and Bleidorn 2016;  
532 Lindsey et al. 2018) (Figure 1A).

533 Depending on the prior we use for substitution-rate variation, we estimate that *w*Mau and  
534 other Supergroup B *Wolbachia* diverged from Supergroup A strains about 6–46 mya. This is  
535 roughly consistent with a prior estimate using only *ftsZ* (58 to 67 mya, Werren et al. 1995), but is  
536 inconsistent with a recent estimate using 179,763 bases across 252 loci (76–460 mya, Gerth and

537 Bleidorn 2016). There are several reasons why we question the Gerth and Bleidorn (2016)  
538 calibration. First, Gerth and Bleidorn (2016)'s chronogram placed *wNo* sister to all other  
539 Supergroup B *Wolbachia*, in disagreement with their own phylogram (Gerth and Bleidorn 2016,  
540 Figure 3). In contrast, our phylogram and that of Lindsey et al. (2018) support *wAlbB* splitting  
541 from all other strains at this node. Second, the Gerth and Bleidorn (2016) calibration estimated  
542 the split between *wRi* that infects *D. simulans* and *wSuz* that infects *D. sukukii* at 900,000 years.  
543 This estimate is nearly two orders of magnitude higher than the 11,000 year estimate of Turelli et  
544 al. (2018) who found 0.014% third position divergence between *wRi* and *wSuz* (i.e., 0.007%  
545 along each branch) over 506,307 bases. Raychoudhury et al. (2009) and Richardson et al. (2012)  
546 both estimated a rate of about  $7 \times 10^{-9}$  substitutions/3<sup>rd</sup> position site/year between *Wolbachia* in  
547 *Nasonia* wasps and within *wMel*, respectively. An estimate of 900,000 years requires a rate  
548 about 100 times slower,  $7.8 \times 10^{-11}$  substitutions/3<sup>rd</sup> position site/year, which seems implausible.  
549 Finally, using data kindly provided by Michael Gerth, additional analyses indicate that the third  
550 position rates required for the *Wolbachia* divergence times estimated by Gerth and Bleidorn  
551 (2016) between *Nomada flava* and *N. leucophthalma* ( $1.72 \times 10^{-10}$ ), *N. flava* and *N. panzeri*  
552 ( $3.78 \times 10^{-10}$ ) (their calibration point), and *N. flava* and *N. ferruginata* ( $4.14 \times 10^{-10}$ ) are each  
553 more than 10 times slower than those estimated by Raychoudhury et al. (2009) and Richardson et  
554 al. (2012), which seems unlikely. Our analyses suggest that the A-B group split occurred less  
555 than 100 mya.

556

### 557 **Disruption of the CI phenotype generates relatively low infection frequencies**

558 Across the 171 genes (139,902 bases) included in our phylogenetic analyses, the *wMau* genomes  
559 were identical and differed from *wNo* by only 0.072%. Across the coding regions we analyzed,  
560 we found few SNVs and no CNVs among *wMau* variants. Our analyses did identify four large  
561 deletions shared by all *wMau* genomes, relative to *wNo*. Despite the close relationship between  
562 *wMau* and *wNo*, *wNo* causes CI while *wMau* does not (Giordano et al. 1995; Merçot et al. 1995;  
563 Rousset and Solignac 1995, our data). We searched for all pairs of loci known to cause CI and  
564 found only the *wNo\_RS01050-1055* pair in both *wMau* and *wNo* genomes. All *wMau* variants  
565 share a one-base-pair deletion in *wNo\_RS01050*, relative to this same region in *wNo*. This  
566 mutation introduces a frameshift and more than ten stop codons that we predict disrupt CI in  
567 *wMau*. Disruption of CI in *wMau* is consistent with the prediction that selection does not directly

568 act on the intensity of CI (Prout 1994; Turelli 1994), and we predict that evidence of such  
569 disruption will be found in many other non-CI causing *Wolbachia* genomes—as has already been  
570 reported for a few other strains (Lindsey et al. 2018). Conversely, we predict that facultative  
571 *Wolbachia* lineages displaying loss of CI will be relatively recent. Importantly, non-CI  
572 *Wolbachia* have lower expected equilibrium infection frequencies than do CI-causing variants  
573 (Kriesner et al. 2016). This is consistent with a *wMau* infection frequency of approximately 0.34  
574 on Mauritius (Giordano et al. 1995; our data).

575 *wMau* co-occurs with essentially the same mitochondrial haplotype as *wMa* that infects *D.*  
576 *simulans* on Madagascar and elsewhere in Africa and the South Pacific (Rousset and Solignac  
577 1995; Merçot and Poinot 1998; Ballard 2000a; James and Ballard 2000; James et al. 2002;  
578 Ballard 2004), suggesting *wMau* and *wMa* may be the same strain infecting different host species  
579 following introgressive *Wolbachia* transfer (see below). The CI phenotypes of *wMau* and *wMa*  
580 are also more similar to one another than to *wNo*, with only certain crosses between *wMa*-  
581 infected *D. simulans* males and uninfected *D. simulans* females inducing CI (James and Ballard  
582 2000). Polymorphism in the strength of CI induced by *wMa* could result from host modification  
583 of *Wolbachia*-induced CI (Reynolds and Hoffmann 2002; Cooper et al. 2017), or from  
584 *Wolbachia* titer variation that influences the strength of CI and/or the strength of CI rescue by  
585 infected females. Alternatively, the single-base-pair deletion in the *wNo\_RS01050* gene we  
586 observe in *wMau*, or other mutations that influence CI strength, could be polymorphic in *wMa*.  
587 *wMa* infection frequencies are intermediate on Madagascar (infection frequency = 0.25, binomial  
588 confidence intervals: 0.14, 0.40; James and Ballard 2000), consistent with no CI, which suggests  
589 to us that crosses finding *wMa* CI are likely anomalous or rare. Inclusion of *D. simulans* sampled  
590 from the island of Réunion in this estimate provides additional support for the conjecture that  
591 *wMa* is non-CI-causing (infection frequency = 0.31, binomial confidence intervals: 0.20, 0.45;  
592 James and Ballard 2000). Unfortunately, *wMa*-infected *D. simulans* were not available for us to  
593 genotype and phenotype.

594 Our genomic data indicate that *wMau* may maintain an ability to rescue CI, as the  
595 *wNo\_RS01055* gene is intact with only one nonsynonymous substitution relative to the same  
596 region in *wNo*. *wNo\_RS01055* is orthologous to WD0631 (*cifA*) in *wMel*, recently shown to  
597 underlie CI rescue (Shropshire et al. 2018). *wMa* seems to sometimes rescue CI, but conflicting  
598 patterns have been found, and additional experiments are needed to resolve this (Rousset and

599 Solignac 1995; Bourtzis et al. 1998; Merçot and Poinso 1998; James and Ballard 2000; Merçot  
600 and Poinso 2003; Zabalou et al. 2008). Testing for CI rescue by *wMau*- and *wMa*-infected  
601 females crossed with males infected with *wNo* or other CI-causing strains, combined with  
602 genomic analysis of CI loci in *wMa*, will help resolve the relationship between these variants and  
603 their CI phenotypes.

604

#### 605 ***wMau* does not influence *D. mauritiana* fecundity**

606 While selection does not directly act on the level of CI (Prout 1994; Turelli 1994; Haygood and  
607 Turelli 2009), it does act to increase the product of *Wolbachia* effects on host fitness and the  
608 efficiency of maternal transmission (Turelli 1994). Understanding the *Wolbachia* effects that  
609 lead to spread from low frequencies and the persistence of non-CI causing *Wolbachia* is crucial  
610 to explaining *Wolbachia* prevalence among insects and other arthropods. The four-fold fecundity  
611 effect of *wMau* reported by Fast et al. (2011) in *D. mauritiana* is inconsistent with our  
612 experiments and with the intermediate infection frequencies observed in nature. We find no  
613 *wMau* effects on host fecundity, regardless of host background or female age. Our results are  
614 consistent with an earlier analysis that assessed egg lay of a single genotype that found no *wMau*  
615 fecundity effects (Giordano et al. 1995), and with our mathematical analyses that indicate  
616 *Wolbachia* can increase host fitness by at most 50% for reasonable estimates of  $\mu$ .

617

#### 618 **Introgressive *Wolbachia* transfer likely predominates in the *D. simulans* clade**

619 Hybridization and introgression in the *D. simulans* clade may have led to introgressive transfer  
620 of *Wolbachia* among host species (Rousset and Solignac 1995), which has also been observed in  
621 other *Drosophila* (Turelli et al. 2018) and in *Nasonia* wasps (Raychoudhury et al. 2009). While  
622 *D. mauritiana* is singly infected by *wMau*, *D. simulans* is infected by several strains that include  
623 CI-causing *wHa* and *wNo* that often occur as double infections within individuals (O'Neill and  
624 Karr 1990; Merçot et al. 1995; Rousset and Solignac 1995). *wHa* and *wNo* are similar to *wSh*  
625 and *wSn*, respectively, that infect *D. sechellia* (Giordano et al. 1995; Rousset and Solignac  
626 1995). *wHa* and *wSh* also occur as single infection in *D. simulans* and in *D. sechellia*,  
627 respectively (Rousset and Solignac 1995). In contrast, *wNo* almost always occurs alongside *wHa*  
628 in doubly infected *D. simulans* individuals (James et al. 2002), and *wSn* seems to occur only in  
629 individuals also infected by *wSh* (Rousset and Solignac 1995). *D. simulans* has three distinct

630 mitochondrial haplotypes (*siI*, *siII*, *siIII*) associated with *wAu/wRi* (*siII*), *wHa/wNo* (*siI*), and  
 631 *wMa* (*siIII*). The *siI* haplotype is closely related to the *se* haplotype found with *wSh* and *wSn* in  
 632 *D. sechellia* (Ballard 2000b). *wMa* co-occurs with the *siIII* haplotype, which differs over its  
 633 protein-coding genes by a single base pair from the *maI* mitochondrial haplotype carried by  
 634 *wMau*-infected *D. mauritiana*—a second haplotype (*maII*) is carried by only uninfected *D.*  
 635 *mauritiana* (Ballard 2000a; James and Ballard 2000).  
 636

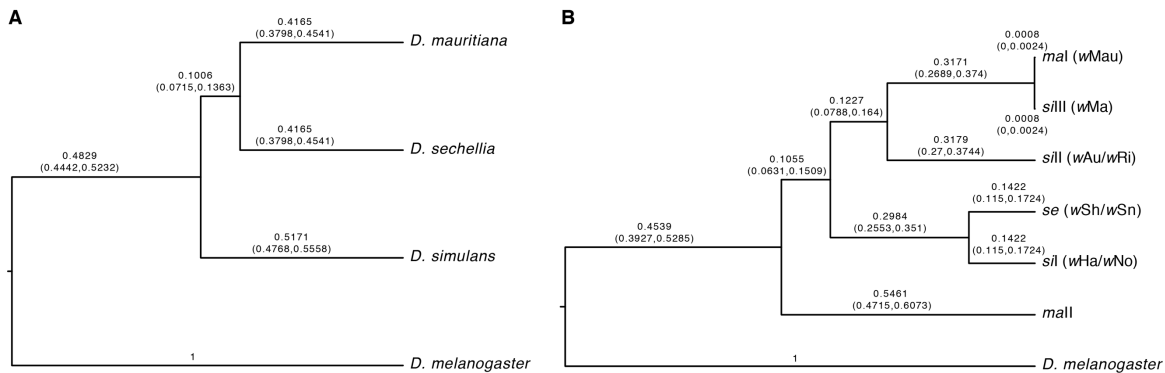

**Figure 5. A)** A nuclear relative chronogram. **B)** A mitochondrial relative chronogram with co-occurring *Wolbachia* strains listed in parentheses. See the text for an interpretation of the results, as noted the apparent resolution of the *D. simulans* clade is an artifact of the phylogenetic analysis.

637 The lack of whole *wMa* genome data precludes us from confidently resolving the mode of  
 638 *wMau* acquisition in *D. mauritiana*. However, mitochondrial relationships support the proposal  
 639 of Ballard (2000b) that *D. mauritiana* acquired *wMau* and the *maI* mitochondrial haplotype via  
 640 introgression from *wMa*-infected *D. simulans* carrying *siIII*. *D. mauritiana* mitochondria are  
 641 paraphyletic relative to *D. sechellia* and *D. simulans* mitochondria (Solignac and Monnerot  
 642 1986; Satta and Takahata 1990; Ballard 2000a, 2000b), with *maI* sister to *siIII* and *maII* outgroup  
 643 to all other *D. simulans*-clade haplotypes (see Figure 5). Of the nine genomes we assessed, all  
 644 but one (uninfected-*R44*) carry the *maI* haplotype, and genotypes carrying *maI* are both *wMau*-  
 645 infected ( $N = 5$ ) and uninfected ( $N = 3$ ). While *wMa*-infected *D. simulans* carry *siIII*, *wNo*-  
 646 infected *D. simulans* carry *siI*. We estimate that *wMau* and *wNo* diverged about 55,000 years  
 647 ago, with only 0.068% sequence divergence over 682,494 bp. Nevertheless, it seems implausible  
 648 that *wNo* (versus *wMa*) was transferred directly to *D. mauritiana* as this requires horizontal or  
 649 paternal transmission of *wNo* into a *D. mauritiana* background already carrying the *maI*

650 mitochondrial haplotype. Figure 5 shows relative chronograms for nuclear genes (A) and  
651 mtDNA haplotypes (B) for the *D. simulans* clade with *D. melanogaster* as the outgroup.  
652 Although the nuclear result suggests a confident phylogenetic resolution of the *D. simulans*  
653 clade, this is an artifact of the bifurcation structure imposed by the phylogenetic analysis.  
654 Population genetic analyses show a complex history of introgression and probable shared  
655 ancestral polymorphisms (Kliman et al. 2000) among these three species. Consistent with this, of  
656 the 20 nuclear loci we examined, 6 (*aconitase*, *aldolase*, *bicoid*, *ebony*, *enolase*, *ninaE*)  
657 supported *D. mauritiana* as the outgroup within the *D. simulans* clade, 7 (*glyp*, *pepck*, *pgm*, *pic*,  
658 *ptc*, *transaldolase*, *wingless*) supported *D. sechellia* as the outgroup, and 7 (*esc*, *g6pdh*, *glys*, *pgi*,  
659 *tpi*, *white*, *yellow*) supported *D. simulans*. With successive invasions of the islands and purely  
660 allopatric speciation, we expect the outgroup to be the island endemic that diverged first. Figure  
661 5 indicates that the *maII* haplotype diverged from the other mtDNA haplotypes roughly when the  
662 clade diverged, with the other haplotypes subject to a complex history of introgression and  
663 *Wolbachia*-associated sweeps, as described by Ballard (2000b).

664 Ballard (2000b) estimated that *siIII-maI* diverged about 4,500 years ago, which presumably  
665 approximates the date of the acquisition of *wMau* (and *siIII*, which became *maI*) by *D.*  
666 *mauritiana*. This is surely many thousands of generations. As shown by our mathematical  
667 analyses (Eq. 3), the apparent persistence of the *maII* mtDNA among *Wolbachia*-uninfected *D.*  
668 *mauritiana*—without its occurrence among infected individuals—is unexpected. More extensive  
669 sampling of natural *D. mauritiana* populations is needed to see if this unexpected pattern  
670 persists.

671 While paternal transmission has been observed in *D. simulans* (Hoffmann and Turelli 1988;  
672 Turelli and Hoffmann 1995), it seems to be very rare (Richardson et al. 2012; Turelli et al.  
673 2018). *wNo* almost always occurs in *D. simulans* individuals also infected with *wHa*,  
674 complicating this scenario further. It is possible that horizontal or paternal transmission of *wMa*  
675 or *wNo* between *D. simulans* backgrounds carrying different mitochondrial haplotypes underlies  
676 the similarities of these strains within *D. simulans*, despite their co-occurrence with distinct  
677 mitochondria. Given the diversity of *Wolbachia* that infect *D. simulans*-clade hosts, and known  
678 patterns of hybridization and introgression among hosts (Garrigan et al. 2012; Brand et al. 2013;  
679 Garrigan et al. 2014; Matute and Ayroles 2014; Schrider et al. 2018), determining relationships  
680 among these *Wolbachia* and how *D. mauritiana* acquired *wMau* will require detailed



681 phylogenomic analysis of nuclear, mitochondrial, and *Wolbachia* genomes in the *D. simulans*  
682 clade.

683

## 684 **Conclusions**

685 Disruption of CI contributes to intermediate *w*Mau infection frequencies on Mauritius that must  
686 be at balance between positive *w*Mau fitness effects and imperfect maternal transmission. The  
687 specific fitness effects underlying *Wolbachia* persistence remain elusive in this system as with  
688 most other non-CI *Wolbachia* infections. Analysis of fecundity effects and other phenotypes like  
689 nutritional supplementation and protection from harmful bacteria (Brownlie et al. 2009; Gupta et  
690 al. 2017; Kriesner and Hoffmann 2018), across a diversity of *Wolbachia*-infected hosts, will shed  
691 light of whether these phenotypes generally influence the spread and persistence of *Wolbachia*.  
692 Our mathematical analysis suggests that extreme fitness effects like those reported by Fast et al.  
693 (2011) are biologically implausible. Accurate estimates of *Wolbachia* effects on host fitness  
694 across host genomic backgrounds and abiotic environments, combined with estimates of  
695 *Wolbachia* maternal transmission in nature, are needed to explain the global *Wolbachia*  
696 pandemic and to improve the efficacy of transinfected *Wolbachia* as biocontrol agents.

697

## 698 **AUTHOR CONTRIBUTIONS**

699 MM performed the molecular and phenotypic work, participated in the design of the study, and  
700 contributed to the writing; WC performed the phylogenetic and genomic analyses and  
701 contributed to the writing; SR contributed to the molecular and phenotypic analyses and to the  
702 writing; JB performed the library preparation and contributed to the writing; MT contributed to  
703 the analyses, data interpretation, and writing; BSC designed and coordinated the study,  
704 contributed to the analyses and data interpretation, and drafted the manuscript. All authors gave  
705 final approval for publication.

706

## 707 **ACKNOWLEDGMENTS**

708 We thank Margarita Womack for sampling the *D. mauritiana* used in this study and Daniel  
709 Matute for sharing them. We thank Michael Gerth for sharing *Nomada* genomic data and Tim  
710 Wheeler for taking photos of *D. mauritiana*. Isaac Humble, Maria Kirby, and Tim Wheeler  
711 assisted with data collection. Michael Gerth, Michael Hague, and Amelia Lindsey provided



712 comments that improved earlier drafts of this manuscript. Computational resources were  
713 provided by the University of Montana Genomics Core. Research reported in this publication  
714 was supported by the National Institute Of General Medical Sciences of the National Institutes of  
715 Health (NIH) under Award Number R35GM124701 to B.S.C. The content is solely the  
716 responsibility of the authors and does not necessarily represent the official views of the NIH.

717

#### 718 **DATA ACCESSIBILITY STATEMENT**

719 All phenotypic data will be archived in DRYAD and all genetic data will be archived in  
720 GenBank at the time of acceptance.

721

722

723

724

725

726

727

728

729

730

731

732

733

734

735

736

737

738

739

740

741

742

743 **REFERENCES**

- 744 Baldo, L., N. A. Ayoub, C. Y. Hayashi, J. A. Russell, J. K. Stahlhut, and J. H. Werren. 2008  
745 Insight into the routes of *Wolbachia* invasion: high levels of horizontal transfer in the  
746 spider genus *Agelenopsis* revealed by *Wolbachia* strain and mitochondrial DNA  
747 diversity. *Molecular Ecology* 17:557–569.
- 748 Ballard, J. W. O. 2000a. When one is not enough: introgression of mitochondrial DNA in  
749 *Drosophila*. *Molecular Biology and Evolution* 17:1126–1130.
- 750 Ballard, J. W. 2000b. Comparative genomics of mitochondrial DNA in *Drosophila simulans*.  
751 *Journal of Molecular Evolution* 51:64–75.
- 752 Ballard, J. W. O. 2004. Sequential evolution of a symbiont inferred from the host: *Wolbachia*  
753 and *Drosophila simulans*. *Molecular Biology and Evolution* 21:428–442.
- 754 Ballard, J. W., and R. G. Melvin. 2007. Tetracycline treatment influences mitochondrial  
755 metabolism and mtDNA density two generations after treatment in *Drosophila*. *Insect*  
756 *Molecular Biology* 16:799–802.
- 757 Barton, N. H., and M. Turelli. 2011. Spatial waves of advance with bistable dynamics:  
758 cytoplasmic and genetic analogues of allee effects. *American Naturalist* 178:E48–E75.
- 759 Beckmann, J. F., and A. M. Fallon. 2013. Detection of the *Wolbachia* protein WPI0282 in  
760 mosquito spermathecae: implications for cytoplasmic incompatibility. *Insect*  
761 *Biochemistry and Molecular Biology* 43:867–878.
- 762 Beckmann, J. F., J. A. Ronau and M. Hochstrasser. 2017. A *Wolbachia* deubiquitylating enzyme  
763 induces cytoplasmic incompatibility. *Nature Microbiology* 2:17007.
- 764 Boeva, V., T. Popova, K. Bleakley, P. Chiche, J. Cappelletti, G. Schleiermacher, I. Janoueix-Lerosey,  
765 O. Delattre, E. Barillot. 2012. Control-FREEC: a tool for assessing copy number and  
766 allelic content using next-generation sequencing data. *Bioinformatics* 28:423–425.
- 767 Bourtzis, K., S. L. Dobson, H. R. Braig and S. L. O'Neill. 1998. Rescuing *Wolbachia* have been  
768 overlooked. *Nature* 391:852–853.
- 769 Brand, C. L., S. B. Kingan, L. Wu and D. Garrigan. 2013. A Selective Sweep across Species  
770 Boundaries in *Drosophila*. *Molecular Biology and Evolution* 30:2177–2186.
- 771 Brownlie, J. C., B. N. Cass, M. Riegler, J. J. Witsenburg, I. Iturbe-Ormaetxe, E. A. McGraw, S.  
772 L. O'Neill. 2009. Evidence for Metabolic Provisioning by a Common Invertebrate  
773 Endosymbiont, *Wolbachia pipientis*, during Periods of Nutritional Stress. *PLoS*  
774 *Pathogens* 5:e1000368.
- 775 Carrington, L. B., J. R. Lipkowitz, A. A. Hoffmann, and M. Turelli. 2011. A re-examination of  
776 *Wolbachia*-induced cytoplasmic incompatibility in California *Drosophila simulans*. *PLoS*  
777 *ONE* 6:e22565
- 778 Caspari, E., and G. S. Watson. 1959. On the evolutionary importance of cytoplasmic sterility in  
779 mosquitoes. *Evolution* 13:568–570.
- 780 Conner, W. R., M. L. Blaxter, G. Anfora, L. Ometto, O. Rota-Stabelli, and M. Turelli. 2017.  
781 Genome comparisons indicate recent transfer of *w*Ri-like *Wolbachia* between sister  
782 species *Drosophila sukii* and *D. subpulchrella*. *Ecology and Evolution* 7:9391–9404.
- 783 Cooper, B. S., P. S. Ginsberg, M. Turelli and D. R. Matute. 2017. *Wolbachia* in the *Drosophila*  
784 *yakuba* complex: pervasive frequency variation and weak cytoplasmic incompatibility,  
785 but no apparent effect on reproductive isolation. *Genetics* 205:333–351.
- 786 David, J., S. McEvey, M. Solignac and L. Tsacas. 1989. *Drosophila* communities on Mauritius  
787 and the ecological niche of *D. mauritiana* (Diptera, Drosophilidae). *Revue De Zoologie*  
788 *Africaine – Journal of African Zoology* 103:107–116.

- 789 Dean, M. D., and J. W. Ballard. 2004. Linking phylogenetics with population genetics to  
790 reconstruct the geographic origin of a species. *Molecular Phylogenetics and Evolution*  
791 32:998–1009.
- 792 Efron, B., and R. Tibshirani. 1993. *An Introduction to the Bootstrap*. Chapman & Hall, New  
793 York, NY.
- 794 Ellegaard, K. M., L. Klasson, K. Näslund, K. Bourtzis and S. G. E. Andersson. 2013.  
795 Comparative Genomics of *Wolbachia* and the Bacterial Species Concept. *PLoS Genetics*  
796 9:e1003381.
- 797 Fast, E. M., M. E. Toomey, K. Panaram, D. Desjardins, E. D. Kolaczyk, H. M. Frydman. 2011.  
798 *Wolbachia* enhance *Drosophila* stem cell proliferation and target the germline stem cell  
799 niche. *Science* 334:990–992.
- 800 Fisher, R. A. 1937. The wave of advance of advantageous genes. *Annals of Eugenics* 7:355–369.
- 801 Garrigan, D., S. B. Kingan, A. J. Geneva, P. Andolfatto, A. G. Clark, K. R. Thornton, D. C.  
802 Presgraves. 2012. Genome sequencing reveals complex speciation in the *Drosophila*  
803 *simulans* clade. *Genome Research* 22:1499–1511.
- 804 Garrigan, D., S. B. Kingan, A. J. Geneva, J. P. Vedanayagam and D. C. Presgraves. 2014.  
805 Genome diversity and divergence in *Drosophila mauritiana*: multiple signatures of faster  
806 X evolution. *Genome Biology and Evolution* 6:2444–2458.
- 807 Gerth, M., and C. Bleidorn. 2016. Comparative genomics provides a timeframe for *Wolbachia*  
808 evolution and exposes a recent biotin synthesis operon transfer. *Nature Microbiology*  
809 2:16241.
- 810 Giordano, R., S. L. O'Neill and H. M. Robertson. 1995. *Wolbachia* infections and the expression  
811 of cytoplasmic incompatibility in *Drosophila sechellia* and *D. mauritiana*. *Genetics*  
812 140:1307–1317.
- 813 Gloor, G. B., C. R. Preston, D. M. Johnsonschlitz, N. A. Nassif, R. W. Phillis, W. K. Benz, H.  
814 M. Robertson, W. R. Engels. 1993. Type-1 repressors of P-element mobility. *Genetics*  
815 135:81–95.
- 816 Gupta, V., R. B. Vasanthakrishnan, J. Siva-Jothy, K. M. Monteith, S. P. Brown, and P. F. Vale.  
817 2017. The route of infection determines *Wolbachia* antibacterial protection in  
818 *Drosophila*. *Proceedings of the Royal Society B: Biological Sciences* 284:20170809.
- 819 Hamm, C. A., D. J. Begun, A. Vo, C. C. R. Smith, P. Saelao, A. O. Shaver, J. Jaenike, M.  
820 Turelli. 2014. *Wolbachia* do not live by reproductive manipulation alone: infection  
821 polymorphism in *Drosophila suzukii* and *D. subpulchrella*. *Molecular Ecology* 23:4871–  
822 4885.
- 823 Haygood, R., and M. Turelli. 2009. Evolution of incompatibility-inducing microbes in  
824 subdivided host populations. *Evolution* 63:432–447
- 825 Hedges, L. M., J. C. Brownlie, S. L. O'Neill and K. N. Johnson. 2008. *Wolbachia* and virus  
826 protection in insects. *Science* 322:702.
- 827 Hilgenboecker, K., P. Hammerstein, P. Schlattmann, A. Telschow and J. H. Werren. 2008. How  
828 many species are infected with *Wolbachia*? A statistical analysis of current data. *FEMS*  
829 *Microbiology Letters* 281:215–220.
- 830 Hoffmann, A. A., and M. Turelli. 1988. Unidirectional incompatibility in *Drosophila simulans*:  
831 Inheritance, geographic variation and fitness effects. *Genetics* 119:435–444.
- 832 Hoffmann, A. A., and M. Turelli. 1997. Cytoplasmic incompatibility in insects. In *Influential*  
833 *passengers: inherited microorganisms and arthropod reproduction*, edited by S. L.  
834 O'Neill, J. H. Werren, and A. A. Hoffmann. Oxford University Press, pp. 42–80.

- 835 Hoffmann, A. A., D. Clancy and J. Duncan. 1996. Naturally-occurring *Wolbachia* infection in  
836 *Drosophila simulans* that does not cause cytoplasmic incompatibility. *Heredity* 76:1–8.
- 837 Hoffmann, A. A., M. Hercus and H. Dagher. 1998. Population dynamics of the *Wolbachia*  
838 infection causing cytoplasmic incompatibility in *Drosophila melanogaster*. *Genetics*  
839 148:221–231.
- 840 Hoffmann, A. A., M. Turelli, and L. G. Harshman. 1990. Factors affecting the distribution of  
841 cytoplasmic incompatibility in *Drosophila simulans*. *Genetics* 126:933–948.
- 842 Hoffmann, A. A., B. L. Montgomery, J. Popovici, I. Iturbe-Ormaetxe, P. H. Johnson, F. Muzzi,  
843 M. Greenfield, M. Durkan, Y. S. Leong, Y. Dong, H. Cook, J. Axford, A. G. Callahan, N.  
844 Kenny, C. Omodei, E. A. McGraw, P. A. Ryan, S. A. Ritchie, M. Turelli, and S. L.  
845 O'Neill. 2011. Successful establishment of *Wolbachia* in *Aedes* populations to suppress  
846 dengue transmission. *Nature* 476:454–457.
- 847 Höhna, S., M. J. Landis, T. A. Heath, B. Boussau, N. Lartillot, B. R. Moore, J. P. Huelsenbeck,  
848 F. Ronquist. 2016. RevBayes: Bayesian Phylogenetic Inference Using Graphical Models  
849 and an Interactive Model-Specification Language. *Systematic Biology*. 65:726–736.
- 850 Huigens, M. E., R. P. de Almeida, P. A. Boons, R. F. Luck and R. Stouthamer. 2004. Natural  
851 interspecific and intraspecific horizontal transfer of parthenogenesis-inducing *Wolbachia*  
852 in *Trichogramma* wasps. *Proceedings of the Royal Society B: Biological Sciences*  
853 271:509–515.
- 854 Jackman, S. D., B. P. Vandervalk, H. Mohamadi, J. Chu, S. Yeo, S. A. Hammond, G. Jahesh, H.  
855 Khan, L. Coombe, R. L. Warren, I. Birol. 2017. ABySS 2.0: resource-efficient assembly  
856 of large genomes using a Bloom filter. *Genome Research* 27:768–777.
- 857 James, A. C., and J. W. O. Ballard. 2000. Expression of cytoplasmic incompatibility in  
858 *Drosophila simulans* and its impact on infection frequencies and distribution of  
859 *Wolbachia pipientis*. *Evolution* 54:1661–1672.
- 860 James, A. C., M. D. Dean, M. E. McMahon and J. W. Ballard. 2002. Dynamics of double and  
861 single *Wolbachia* infections in *Drosophila simulans* from New Caledonia. *Heredity*  
862 88:182–189.
- 863 Jeyaprakash, A., and M. A. Hoy. 2000. Long PCR improves *Wolbachia* DNA amplification: wsp  
864 sequences found in 76% of sixty-three arthropod species. *Insect Molecular Biology*  
865 9:393–405.
- 866 Joshi, N. A., and J. N. Fass. 2011. Sickle: A sliding-window, adaptive, quality-based trimming  
867 tool for FastQ files (Version 1.33). Available at <https://github.com/najoshi/sickle>.
- 868 Katoh, K., and D. M. Standley. 2013. MAFFT Multiple Sequence Alignment Software Version  
869 7: Improvements in Performance and Usability. *Molecular Biology and Evolution*  
870 30:772–780.
- 871 Kent, B. N., L. Salichos, J. G. Gibbons, A. Rokas, I. L. Newton, M. E. Clark, S. R. Bordenstein.  
872 2011. Complete bacteriophage transfer in a bacterial endosymbiont (*Wolbachia*)  
873 determined by targeted genome capture. *Genome Biology and Evolution* 3:209–218.
- 874 Klasson, L., T. Walker, M. Sebahia, M. J. Sanders, M. A. Quail, A. Lord, S. Sanders, J. Earl, S.  
875 L. O'Neill, N. Thomson, S. P. Sinkins, J. Parkhill. 2008. Genome evolution of *Wolbachia*  
876 strain wPip from the *Culex pipiens* group. *Molecular Biology and Evolution* 25:1877–  
877 1887.
- 878 Klasson, L., J. Westberg, P. Sapountzis, K. Näslund, Y. Lutnaes, A. C. Darby, Z. Veneti, L.  
879 Chen, H. R. Braig, and R. Garrett. 2009. The mosaic genome structure of the *Wolbachia*

- 880 *w*Ri strain infecting *Drosophila simulans*. Proceedings of the National Academy of  
881 Sciences 106:5725–5730.
- 882 Kliman, R. M., P. Andolfatto, J. A. Coyne, F. Depaulis, M. Kreitman, A. J. Berry, J. McCarter, J.  
883 Wakeley, and J. Hey. 2000. The population genetics of the origin and divergence of the  
884 *Drosophila simulans* species complex. Genetics 156:1913–1931.
- 885 Kriesner, P., and A. A. Hoffmann. 2018. Rapid spread of a *Wolbachia* infection that does not  
886 affect host reproduction in *Drosophila simulans* cage populations. Evolution 72:1475–  
887 1487.
- 888 Kriesner, P., W. R. Conner, A. R. Weeks, M. Turelli, and A. A. Hoffmann. 2016. Persistence of  
889 a *Wolbachia* infection frequency cline in *Drosophila melanogaster* and the possible role  
890 of reproductive dormancy. Evolution 70:979–997.
- 891 Kriesner, P., A. A. Hoffmann, S. F., Lee, M. Turelli, and A. R. Weeks. 2013. Rapid sequential  
892 spread of two *Wolbachia* variants in *Drosophila simulans*. PLoS Pathogens 9:e1003607.
- 893 Lachaise, D., J. R. David, F. Lemeunier, L. Tsacas and M. Ashburner. 1986. The reproductive  
894 relationships of *Drosophila sechellia* with *D. mauritiana*, *D. simulans*, and *D.*  
895 *melanogaster* from the Afrotropical region. Evolution 40:262–271.
- 896 Legrand, D., T. Chenel, C. Campagne, D. Lachaise and M. L. Cariou. 2011. Inter-island  
897 divergence within *Drosophila mauritiana*, a species of the *D. simulans* complex: Past  
898 history and/or speciation in progress? Molecular Ecology 20:2787–2804.
- 899 LePage, D. P., J. A. Metcalf, S. R. Bordenstein, J. On, J. I. Perlmutter, J. D. Shropshire, E. M.  
900 Layton, L. J. Funkhouser-Jones, J. F. Beckmann, S. R. Bordenstein. 2017. Prophage WO  
901 genes recapitulate and enhance *Wolbachia*-induced cytoplasmic incompatibility. Nature  
902 543:243–247.
- 903 Li, H., and R. Durbin. 2009. Fast and accurate short read alignment with Burrows-Wheeler  
904 transform. Bioinformatics 25:1754–1760.
- 905 Lindsey, A. R. I., D. W. Rice, S. R. Bordenstein, A. W. Brooks, S. R. Bordenstein, A. W.  
906 Brooks, S. R. Bordenstein, I. L. Newton. 2018. Evolutionary Genetics of Cytoplasmic  
907 Incompatibility Genes *cifA* and *cifB* in Prophage WO of *Wolbachia*. Genome Biology  
908 and Evolution 10:434–451.
- 909 Lindsey, A. R. I., J. H. Werren, S. Richards and R. Stouthamer. 2016. Comparative Genomics of  
910 a Parthenogenesis-Inducing *Wolbachia* Symbiont. Genes|Genomes|Genetics. 6:2113–  
911 2123.
- 912 Martinez, J., B. Longdon, S. Bauer, Y.-S. Chan, W. J. Miller, K. Bourtzia, L. Teixeira, F. M.  
913 Jiggins. 2014. Symbionts commonly provide broad spectrum resistance to viruses in  
914 insects: A comparative analysis of *Wolbachia* strains. PLoS Pathogens 10:e1004369.
- 915 Matute, D. R., and J. F. Ayroles. 2014. Hybridization occurs between *Drosophila simulans* and  
916 *D. sechellia* in the Seychelles archipelago. Journal of Evolutionary Biology 27:1057–  
917 1068.
- 918 Mavingui, P., C. Valiente Moro, V. Tran-Van, F. Wisniewski-Dye, V. Raquin, G. Minard, F. H.  
919 Tran, D. Voronin, Z. Rouy, P. Bustos, L. Lozano, V. Barbe, V. Gonzalez. 2012. Whole-  
920 genome sequence of *Wolbachia* strain *w*AlbB, an endosymbiont of tiger mosquito vector  
921 *Aedes albopictus*. Journal of Bacteriology 194:1840.
- 922 McDermott, S. R., and R. M. Kliman. 2008. Estimation of isolation times of the island species in  
923 the *Drosophila simulans* complex from multilocus DNA sequence data. PLoS One  
924 3:e2442.
- 925 Merçot, H., and D. Poinot. 1998. ...and discovered on Mount Kilimanjaro. Nature 391:853.



- 926 Merçot, H., and D. Poinot. 2003. *Wolbachia* transmission in a naturally bi-infected *Drosophila*  
927 *simulans* strain from New-Caledonia. *Entomologia Experimentalis et Applicata* 86:97–  
928 103.
- 929 Merçot, H., B. Llorente, M. Jacques, A. Atlan and C. Montchamp-Moreau. 1995. Variability  
930 within the Seychelles cytoplasmic incompatibility system in *Drosophila simulans*.  
931 *Genetics* 141:1015–1023.
- 932 Nunes, M. D., P. O. Wengel, M. Kreissl and C. Schlotterer. 2010. Multiple hybridization events  
933 between *Drosophila simulans* and *Drosophila mauritiana* are supported by mtDNA  
934 introgression. *Molecular Ecology* 19:4695–4707.
- 935 Ochman, H., and A. C. Wilson. 1987. Evolution in bacteria: evidence for a universal substitution  
936 rate in cellular organisms. *Journal of Molecular Evolution* 26:74–86.
- 937 O'Neill, S. L., R. Giordano, A. M. Colbert, T. L. Karr and H. M. Robertson. 1992. 16S rRNA  
938 phylogenetic analysis of the bacterial endosymbionts associated with cytoplasmic  
939 incompatibility in insects. *Proceedings of the National Academy of Sciences* 89:2699–  
940 2702.
- 941 O'Neill, S. L., and T. L. Karr. 1990. Bidirectional incompatibility between conspecific  
942 populations of *Drosophila simulans*. *Nature* 348:178–180.
- 943 Pinto, S. B., K. Stainton, S. Harris, Z. Kambris, E. R. Sutton, M. B. Bonsall, J. Parkhill, S. P.  
944 Sinkins. 2013. Transcriptional regulation of *Culex pipiens* mosquitoes by *Wolbachia*  
945 influences cytoplasmic incompatibility. *PLoS Pathogens* 9:e1003647.
- 946 Poinot, D., K. Bourtzis, G. Markakis, C. Savakis, and H. Merçot. 1998. *Wolbachia* transfer from  
947 *Drosophila melanogaster* into *D. simulans*: host effect and cytoplasmic incompatibility  
948 relationships. *Genetics* 150:227–237.
- 949 Prout, T. 1994. Some evolutionary possibilities for a microbe that causes incompatibility in its  
950 host. *Evolution* 48:909–911.
- 951 Raychoudhury, R., L. Baldo, D. C. S. G. Oliveira, and J. H. Werren. 2009. Modes of acquisition  
952 of *Wolbachia*: horizontal transfer, hybrid introgression, and codivergence in the *Nasonia*  
953 species complex. *Evolution* 63:165–183.
- 954 Reynolds, K. T., and A. A. Hoffmann. 2002. Male age, host effects and the weak expression or  
955 non-expression of cytoplasmic incompatibility in *Drosophila* strains infected by  
956 maternally transmitted *Wolbachia*. *Genetics Research* 80:79–87.
- 957 Richardson, M. F., L. A. Weinert, J. J. Welch, R. S. Linheiro, M. M. Magwire, F. M. Jiggins, C.  
958 M. Bergman. 2012. Population genomics of the *Wolbachia* endosymbiont in *Drosophila*  
959 *melanogaster*. *PLoS Genetics* 8:e1003129.
- 960 Rousset, F., and M. Solignac. 1995. Evolution of single and double *Wolbachia* symbioses during  
961 speciation in the *Drosophila simulans* complex. *Proceedings of the National Academy of*  
962 *Sciences* 92:6389–6393.
- 963 Satta, Y. and N. Takahata. 1990. Evolution of *Drosophila* mitochondrial DNA and the history of  
964 the *melanogaster* subgroup. *Proceedings of the National Academy of Sciences of the*  
965 *United States of America* 87:9558–9562.
- 966 Schmidt, T. L., N. H. Barton, G. Rašić, A. P. Turley, B. L. Montgomery, I. Iturbe-Ormaetxe, P.  
967 E. Cook, P. A. Ryan, S. A. Ritchie, A. A. Hoffmann, S. L. O'Neill, and M. Turelli. 2017.  
968 Local introduction and heterogeneous spatial spread of dengue-suppressing *Wolbachia*  
969 through an urban population of *Aedes aegypti*. *PLoS Biology* 15:e2001894.

- 970 Schridder, D. R., J. Ayroles, D. R. Matute and A. D. Kern. 2018. Supervised machine learning  
971 reveals introgressed loci in the genomes of *Drosophila simulans* and *D. sechellia*. PLoS  
972 Genetics 14:e1007341.
- 973 Schuler, H., K. Köppler, S. Daxböck-Horvath, B. Rasool, S. Krumböck, D. Schwarz, T. S.  
974 Hoffmeister, B. C. Schlick-Steiner, F. M. Steiner, A. Telschow, C. Stauffer, W.  
975 Arthofer, M. Riegler. 2016. The hitchhiker's guide to Europe: the infection dynamics of  
976 an ongoing *Wolbachia* invasion and mitochondrial selective sweep in *Rhagoletis cerasi*.  
977 Molecular Ecology 25:1595–1609.
- 978 Seemann, T. 2014. Prokka: rapid prokaryotic genome annotation. Bioinformatics 30:2068-2069.
- 979 Shi, M., V. L. White, T. Schlub, J.-S. Eden, A. A. Hoffmann, E. C. Holmes. 2018. No detectable  
980 effect of *Wolbachia* wMel on the prevalence and abundance of the RNA virome of  
981 *Drosophila melanogaster*. Proceedings of the Royal Society B: Biological Sciences  
982 285:20181165.
- 983 Shropshire, J. D., J. On, E. M. Layton, H. Zhou and S. R. Bordenstein. 2018. One prophage WO  
984 gene rescues cytoplasmic incompatibility in *Drosophila melanogaster*. Proceedings of the  
985 National Academy of Sciences. 115:4987–4991.
- 986 Simao, F. A., R. M. Waterhouse, P. Ioannidis, E. V. Kriventseva and E. M. Zdobnov. 2015.  
987 BUSCO: assessing genome assembly and annotation completeness with single-copy  
988 orthologs. Bioinformatics 31:3210–3212.
- 989 Solognac, M. and M. Monnerot. 1986. Race formation, speciation, and introgression within  
990 *Drosophila simulans*, *D. mauritiana*, and *D. schellia* inferred from mitochondrial DNA  
991 analysis. Evolution 40:531–539.
- 992 Sutton, E. R., S. R. Harris, J. Parkhill and S. P. Sinkins. 2014. Comparative genome analysis of  
993 *Wolbachia* strain wAu. BMC Genomics 15:928.
- 994 Taylor, M. J., D. Voronin, K. L. Johnston and L. Ford. 2013. *Wolbachia* filarial interactions. Cell  
995 Microbiology 15: 520–526.
- 996 Team, R. C. 2015. R: A language and environment for statistical computing, *R Foundation for*  
997 *Statistical Computing*, Vienna, Austria.
- 998 Teixeira, L., A. Ferreira and M. Ashburner. 2008. The bacterial symbiont *Wolbachia* induces  
999 resistance to RNA viral infections in *Drosophila melanogaster*. PLoS Biology  
1000 6:e1000002.
- 1001 Toomey, M. E., K. Panaram, E. M. Fast, C. Beatty and H. M. Frydman. 2013. Evolutionarily  
1002 conserved *Wolbachia*-encoded factors control pattern of stem-cell niche tropism in  
1003 *Drosophila* ovaries and favor infection. Proceedings of the National Academy of  
1004 Sciences 110:10788–10793.
- 1005 Turelli, M. 1994. Evolution of incompatibility-inducing microbes and their hosts. Evolution  
1006 48:1500–1513.
- 1007 Turelli, M. and N. H. Barton. 2017. Deploying dengue-suppressing *Wolbachia*: robust models  
1008 predict slow but effective spatial spread in *Aedes aegypti*. Theoretical Population Biology  
1009 115:45–60.
- 1010 Turelli, M. and A. A. Hoffmann. 1995. Cytoplasmic incompatibility in *Drosophila simulans*:  
1011 dynamics and parameter estimates from natural populations. Genetics 140:1319–1338.
- 1012 Turelli, M., A. A. Hoffmann, and S. W. McKechnie. 1992. Dynamics of cytoplasmic  
1013 incompatibility and mtDNA variation in natural *Drosophila simulans* populations.  
1014 Genetics 132:713–723.



1015 Turelli, M., B. S. Cooper, K. M. Richardson, P. S. Ginsberg, B. Peckenpaugh, C. X. Antelope, K.  
1016 J. Kim, M. R. May, A. Abrieux, D. A. Wilson, M. J. Bronski, B. R. Moore, J. J. Gao, M.  
1017 B. Eisen, J. C. Chiu, W. R. Conner, A. A. Hoffmann. 2018. Rapid Global Spread of wRi-  
1018 like *Wolbachia* across Multiple *Drosophila*. *Current Biology* 28:963–971.

1019 Weeks, A. R., M. Turelli, W. R. Harcombe, K. T. Reynolds, and A. A. Hoffmann. 2007. From  
1020 parasite to mutualist: rapid evolution of *Wolbachia* in natural populations of *Drosophila*.  
1021 *PLoS Biology* 5:e114.

1022 Weinert, L. A., E. V. Araujo-Jnr, M. Z. Ahmed and J. J. Welch. 2015. The incidence of bacterial  
1023 endosymbionts in terrestrial arthropods. *Proceedings of the Royal Society of London B:*  
1024 *Biological Sciences* 282:20150249.

1025 Werren, J. H., and D. M. Windsor. 2000. *Wolbachia* infection frequencies in insects: evidence of  
1026 a global equilibrium? *Proceedings of the Royal Society B: Biological Sciences*  
1027 267:1277–1285.

1028 Werren, J. H., W. Zhang and L. R. Guo. 1995. Evolution and phylogeny of *Wolbachia*:  
1029 reproductive parasites of arthropods. *Proceedings of the Royal Society B-Biological*  
1030 *Sciences* 261:55–63.

1031 Wu, M., L. V. Sun, J. Vamathevan, M. Riegler, R. Deboy, J. C. Brownlie, E. A. McGraw, W.  
1032 Martin, C. Esser, N. Ahmadinejad. 2004. Phylogenomics of the reproductive parasite  
1033 *Wolbachia pipientis* wMel: a streamlined genome overrun by mobile genetic elements.  
1034 *PLoS Biology* 2:e69.

1035 Zabalou, S., A. Apostolaki, S. Pattas, Z. Veneti, C. Paraskevopoulos, I. Livadaras, G. Markakis,  
1036 T. Brissac, H. Merçot, K. Bourtzis. 2008. Multiple rescue factors within a *Wolbachia*  
1037 strain. *Genetics* 178:2145–2160.

1038 Zug, R., and P. Hammerstein. 2012. Still a host of hosts for *Wolbachia*: Analysis of recent data  
1039 suggests that 40% of terrestrial arthropod species are infected. *PLoS ONE* 7:e38544.

1040

1041

1042

1043

1044

1045

1046

1047

1048

1049

1050

1051

1052

1053

## 1054 **Appendix 1. Mathematical analyses of mtDNA and *Wolbachia* dynamics**

1055 Our analysis follows the framework developed in Turelli et al. (1992), but is simplified by the  
1056 lack of CI. We suppose that introgression introduces a cytoplasm carrying *Wolbachia* and a  
1057 novel mtDNA haplotype, denoted B. Before *Wolbachia* introduction, we assume the population  
1058 is monomorphic for mtDNA haplotype A. With imperfect maternal *Wolbachia* transmission,  
1059 uninfected individuals will be produced with mtDNA haplotype B. Without horizontal or  
1060 paternal transmission (which are very rare, Turelli et al. 2018), all *Wolbachia*-infected  
1061 individuals will carry mtDNA haplotype B. Once *Wolbachia* is introduced, uninfected  
1062 individuals can have mtDNA haplotype A or B. We assume that these three cytoplasmic types  
1063 (“cytotypes”) differ only in fecundity, and denote their respective fecundities  $F_I$ ,  $F_A$  and  $F_B$ .  
1064 Denote the frequencies of the three cytotypes among adults in generation  $t$  by  $p_{I,t}$ ,  $p_{A,t}$  and  $p_{B,t}$ ,  
1065 with  $p_{I,t} + p_{A,t} + p_{B,t} = 1$ . Without CI, the frequency dynamics are

1066

$$1067 \quad p_{I,t+1} = \frac{p_{I,t}F_I(1-\mu)}{\bar{F}}, \quad p_{A,t+1} = \frac{p_{A,t}F_A}{\bar{F}}, \quad \text{and} \quad p_{B,t+1} = \frac{p_{B,t}F_B + p_{I,t}\mu F_I}{\bar{F}}, \quad \text{with} \quad (A1)$$

1068

$$1069 \quad \bar{F} = F_I p_{I,t} + F_A p_{A,t} + F_B p_{B,t}. \quad (A2)$$

1070

1071 If the uninfected population is initially monomorphic for mtDNA haplotype A, the *Wolbachia*  
1072 infection frequency will increase when rare if and only if

1073

$$1074 \quad F_I(1-\mu) > F_A. \quad (A3)$$

1075

1076 Turelli et al. (1992) showed that if a CI-causing *Wolbachia* is introduced with a cytoplasm  
1077 that contains a novel mtDNA haplotype B, which has no effect on fitness, *Wolbachia*-uninfected  
1078 individuals will eventually all carry haplotype B. This follows because eventually all uninfected  
1079 individuals have *Wolbachia*-infected maternal ancestors. This remains true for non-CI-causing  
1080 *Wolbachia* that satisfy (A3). However, we conjectured that if the introduced B mtDNA is  
1081 deleterious in the new host nuclear background, i.e.,  $F_A > F_B$ , a stable polymorphism might be  
1082 maintained for the alternative mtDNA haplotypes. The motivation was that imperfect maternal  
1083 transmission seemed analogous to migration introducing a deleterious allele into an “island” of  
1084 uninfected individuals. To refute this conjecture, consider the equilibria of (A1) with

1085

$$1086 \quad F_I > F_A \geq F_B. \quad (A4)$$

1087

1088 If all three cytotypes are to be stably maintained, we expect each to increase in frequency when  
 1089 rare. In particular, we expect the fitness-enhancing mtDNA haplotype A to increase when the  
 1090 population contains only infected individuals and uninfected individuals carrying the deleterious  
 1091 *Wolbachia*-associated mtDNA haplotype B. From (A1),  $p_{A,t}$  increases when rare if and only if

1092

$$1093 \quad F_A > \bar{F} = F_I p_{I,t} + F_B(1 - p_{I,t}). \quad (A5)$$

1094

1095 In the absence of haplotype A, we expect  $p_I$  to be at equilibrium between selection and imperfect  
 1096 maternal transmission, i.e.,

1097

$$1098 \quad p_I = 1 - \frac{\mu F}{F - 1}, \quad (A6)$$

1099

1100 with  $F = F_I/F_B$  (Hoffmann and Turelli 1997). Substituting (A6) into (A5) and simplifying, the  
 1101 condition for  $p_{A,t}$  to increase when rare is

1102

$$1103 \quad F_A(F_I - F_B) > F_I(1 - \mu)(F_I - F_B). \quad (A7)$$

1104

1105 By assumption (A4),  $F_I > F_B$ ; hence (A7) contradicts condition (A3), required for initial  
 1106 *Wolbachia* invasion. Thus, simple selection on *Wolbachia*-uninfected mtDNA haplotypes cannot  
 1107 stably maintain an mtDNA polymorphism. The “ancestral” mtDNA haplotype A is expected to  
 1108 be replaced by the less-fit *Wolbachia*-associated haplotype B.

1109 To understand the time scale over which this replacement occurs, let  $r_t$  denote the frequency  
 1110 of haplotype A among *Wolbachia*-uninfected individuals, i.e.,  $r_t = p_{A,t}/(p_{A,t} + p_{B,t})$ . From (A1),

1111

$$1112 \quad r_{t+1} = \frac{r_t F_A}{r_t F_A + (1 - r_t) F_B + \mu F_I [p_{I,t}/(1 - p_{I,t})]}. \quad (A8)$$

1113

1114 If we assume that the mtDNA haplotypes do not affect fitness, i.e.,  $F_A = F_B$ , and that the  
1115 *Wolbachia* infection frequency has reached the equilibrium described by (A6), (A8) reduces to

1116

$$1117 \quad r_{t+1} = r_t/[F(1 - \mu)], \quad (A9)$$

1118

1119 with  $F = F_I/F_B$ .

1120

1121

1122

1123

1124

1125

1126

1127

1128

1129

1130

1131

1132

1133

1134

1135

1136

1137

1138

1139

1140

1141

1142

1143

1144

1145 SUPPLEMENTAL INFORMATION

1146

**Supplemental Table 1.** PCR and qPCR primers used in this study.

| Reaction | Locus/target region                      | Forward primer                             | Reverse primer                         | Reference                  |
|----------|------------------------------------------|--------------------------------------------|----------------------------------------|----------------------------|
| PCR      | <i>wsp: Wolbachia</i><br>surface protein | 5'-<br>TGGTCCAATAA<br>GTGATGAAGAA<br>AC-3' | 5'-<br>AAAAATTAAACGC<br>TACTCCA-3'     | Braig et. al. 1998         |
| PCR      | <i>2L Control: rDNA</i>                  | 5'-<br>TGCAGCTATGGT<br>CGTTGACA-3'         | 5'-<br>ACGAGACAATAAT<br>ATGTGGTGCTG-3' | Designed here              |
| qPCR     | <i>wsp: Wolbachia</i><br>surface protein | 5'-<br>CATTGGTGTTGG<br>TGTTGGTG-3'         | 5'-<br>ACCGAAATAACG<br>AGCTCCAG-3'     | Newton and Sheehan<br>2014 |
| qPCR     | <i>Rpl32: rDNA</i>                       | 5'-<br>CCGCTTCAAGG<br>GACAGTATC-3'         | 5'-<br>CAATCTCCTTGCG<br>CTTCTTG-3'     | Newton and Sheehan<br>2014 |

1147

1148

1149

1150

1151

**Supplemental Table 2.** wMau assembly statistics.

| Genotype   | Scaffold count | N50 (bp) | Longest scaffold (bp) | Total length (bp) |
|------------|----------------|----------|-----------------------|-------------------|
| <i>R9</i>  | 36             | 60,027   | 169,305               | 1,266,004         |
| <i>R29</i> | 36             | 61,106   | 169,295               | 1,277,467         |
| <i>R31</i> | 39             | 63,676   | 169,381               | 1,272,847         |
| <i>R41</i> | 42             | 61,106   | 170,537               | 1,303,156         |
| <i>R60</i> | 38             | 63,156   | 221,751               | 1,282,564         |

1152

1153

1154

1155

1156

1157

**Supplemental Table 3.** Near-universal, single-copy proteobacteria genes (out of 221) found using BUSCO v. 3.0.0.

| <b>Genome</b> | <b>Complete</b> | <b>Duplicated</b> | <b>Fragment</b> | <b>Absent</b> |
|---------------|-----------------|-------------------|-----------------|---------------|
| <i>wRi</i>    | 179             | 1                 | 2               | 39            |
| <i>wMel</i>   | 179             | 1                 | 2               | 39            |
| <i>wAu</i>    | 180             | 1                 | 2               | 38            |
| <i>wHa</i>    | 178             | 1                 | 3               | 39            |
| <i>wNo</i>    | 180             | 1                 | 4               | 36            |
| <i>R9</i>     | 180             | 1                 | 4               | 36            |
| <i>R29</i>    | 180             | 1                 | 4               | 36            |
| <i>R31</i>    | 180             | 1                 | 4               | 36            |
| <i>R41</i>    | 180             | 1                 | 4               | 36            |
| <i>R60</i>    | 180             | 1                 | 4               | 36            |

1158

1159

**Supplementary Table 4:** Genes present in regions deleted in *w*Mau relative to *w*No. Genes predicted to be pseudogenized in *w*No are shaded grey.

| Accession number                     | Name                                              |
|--------------------------------------|---------------------------------------------------|
| <b>Deletion 1 (115,000-142,000):</b> |                                                   |
| wNO_RS00550                          | Hypothetical protein                              |
| wNO_RS06015                          | Ankyrin repeat domain protein                     |
| wNO_RS00560                          | Pseudo IS256 family transposase, frameshifted     |
| wNO_RS00565                          | Recombinase family protein                        |
| wNO_RS00570                          | DUF2924 domain-containing protein                 |
| wNO_RS00575                          | Ankyrin repeat domain-containing protein          |
| wNO_RS00580                          | Ankyrin repeat domain-containing protein          |
| wNO_RS00585                          | Phage tail protein                                |
| wNO_RS00590                          | Baseplate assembly protein GpJ                    |
| wNO_RS00595                          | Pseudo baseplate assembly protein W, frameshifted |
| wNO_RS00600                          | Hypothetical protein                              |
| wNO_RS00605                          | Phage baseplate assembly protein V                |
| wNO_RS00610                          | Hypothetical protein                              |
| wNO_RS00615                          | Putative minor tail protein Z                     |
| wNO_RS00620                          | Hypothetical protein                              |
| wNO_RS00625                          | Minor capsid protein E                            |
| wNO_RS00630                          | Head decoration protein                           |
| wNO_RS00635                          | S49 family peptidase                              |
| wNO_RS00640                          | Pseudo phage portal protein, frameshifted         |
| wNO_RS00645                          | Phage head stabilizing protein GpW                |
| wNO_RS00650                          | Phage terminase large subunit family protein      |
| wNO_RS00655                          | Ankyrin repeat domain-containing protein          |
| wNO_RS00660                          | Hypothetical protein                              |
| wNO_RS00665                          | Hypothetical protein                              |
| wNO_RS00670                          | Sigma-70 family RNA polymerase sigma factor       |
| wNO_RS00675                          | ATP-binding protein                               |



|                                          |                                                                  |
|------------------------------------------|------------------------------------------------------------------|
| wNO_RS00680                              | IS110 family transposase                                         |
| <b>Deletion 2 (590,000-593,000):</b>     |                                                                  |
| wNO_RS02645                              | XRE family transcriptional regulator                             |
| wNO_RS02650                              | Hypothetical protein                                             |
| wNO_RS02655                              | Hypothetical protein                                             |
| wNO_RS02660                              | XRE family transcriptional regulator                             |
| <b>Deletion 3 (982,000-991,000):</b>     |                                                                  |
| wNO_RS04690                              | Group II intron reverse transcriptase/maturase                   |
| wNO_RS06355                              | Hypothetical protein                                             |
| wNO_RS04695                              | Pseudo hypothetical protein, partial                             |
| wNO_RS04700                              | Pseudo cell filamentation protein Fic, partial                   |
| wNO_RS04705                              | Hypothetical protein                                             |
| wNO_RS04710                              | DNA methylase                                                    |
| wNO_RS04715                              | Hypothetical protein                                             |
| wNO_RS04720                              | Ankyrin repeat domain-containing protein                         |
| wNO_RS04725                              | Phage terminase large subunit family protein                     |
| wNO_RS04730                              | Phage head stabilizing protein GpW                               |
| wNO_RS04735                              | DUF1016 domain-containing protein                                |
| <b>Deletion 4 (1,195,000-1,199,000):</b> |                                                                  |
| wNO_RS06095                              | Ankyrin repeat domain protein                                    |
| wNO_RS05590                              | Rpn family recombination-promoting nuclease/putative transposase |

1160  
1161  
1162  
1163  
1164
